# Supplementary material
Source: publisher figshare collection journal article supplement (https://diabetesjournals.figshare.com/ndownloader/files/27508088)
Supplement: Supplementary file 1 [file 27508088]

## Sheet: Sheet1
cage_element	statistic	zscore	mad.score	pval.mad	pval.zscore
chr10_102027312_102027510	0.41061	15.2561	11.3718	2.88817e-30	7.49835e-53
chr10_102289504_102289702	0.0830184	1.02094	0.761002	0.223328	0.153642
chr10_102672637_102672835	0.247867	8.18425	6.10051	5.28668e-10	1.37006e-16
chr10_102747148_102747346	0.424437	15.857	11.8197	1.5437e-32	6.29245e-57
chr10_103124662_103124860	0.177756	5.13766	3.82959	6.41774e-05	1.39088e-07
chr10_103347837_103348035	0.0782963	0.815741	0.60805	0.271577	0.207324
chr10_103347972_103348170	0.644032	25.3992	18.9325	3.08058e-80	1.28685e-142
chr10_1034289_1034487	0.526318	20.2841	15.1197	6.00728e-52	8.88908e-92
chr10_103543042_103543240	0.159098	4.3269	3.22525	0.000629304	7.56113e-06
chr10_103578090_103578288	0.119319	2.59835	1.9368	0.0263849	0.00468364
chr10_103912068_103912266	0.977781	39.9019	29.7427	1.0763e-194	0
chr10_104005252_104005450	0.0405405	-0.824897	-0.614875	0.730681	0.795285
chr10_104192268_104192466	0.416684	15.5201	11.5686	2.97264e-31	1.26916e-54
chr10_104262349_104262547	0.191713	5.74413	4.28165	9.27553e-06	4.61973e-09
chr10_104474002_104474200	0.171508	4.86617	3.62722	0.000143242	5.68906e-07
chr10_104613931_104614129	0.223905	7.14303	5.32439	5.06471e-08	4.56478e-13
chr10_105156122_105156320	0.0357143	-1.03462	-0.7712	0.779706	0.849576
chr10_106028625_106028823	0.215987	6.79897	5.06792	2.01089e-07	5.26855e-12
chr10_106034822_106035020	0.300837	10.486	7.81623	2.72139e-15	5.00836e-26
chr10_106897925_106898123	0.37459	13.6909	10.2051	9.40372e-25	5.75544e-43
chr10_111674751_111674949	0.0857141	1.13807	0.848315	0.198131	0.127545
chr10_112678822_112679020	0.141181	3.54833	2.64491	0.00408564	0.000193843
chr10_114206564_114206762	0.286137	9.84725	7.3401	1.06719e-13	3.52242e-23
chr10_114206899_114207097	0.214208	6.72167	5.0103	2.7172e-07	8.98285e-12
chr10_115439556_115439754	0.402286	14.8944	11.1022	6.11829e-29	1.79219e-50
chr10_115933836_115934034	0.265638	8.95648	6.67612	1.22674e-11	1.6761e-19
chr10_116286520_116286718	0.140608	3.52345	2.62637	0.00431506	0.00021298
chr10_116697886_116698084	0.104526	1.95553	1.45764	0.0724694	0.0252603
chr10_118313134_118313332	0.0833333	1.03462	0.771203	0.220293	0.150423
chr10_118313234_118313432	0.0349652	-1.06717	-0.795461	0.786827	0.857052
chr10_118350372_118350570	0.189073	5.62943	4.19615	1.35744e-05	9.04056e-09
chr10_118350572_118350770	0.290371	10.0312	7.47723	3.79517e-14	5.55663e-24
chr10_118350672_118350870	0.0348837	-1.07071	-0.798101	0.787594	0.857849
chr10_118351232_118351430	0.141222	3.55012	2.64625	0.00406954	0.000192528
chr10_118380324_118380522	0.181815	5.31405	3.96107	3.73067e-05	5.36068e-08
chr10_118380424_118380622	1.01562	41.5463	30.9685	7.16928e-211	0
chr10_118380722_118380920	0.0571393	-0.103614	-0.0772333	0.530781	0.541262
chr10_118609122_118609320	0.557378	21.6338	16.1257	8.41441e-59	4.32219e-104
chr10_120101709_120101907	0.291597	10.0845	7.51696	2.80317e-14	3.23398e-24
chr10_121578130_121578328	0.194446	5.86289	4.37018	6.20732e-06	2.27438e-09
chr10_121652139_121652337	0.0909091	1.36382	1.01658	0.154676	0.0863126
chr10_12237746_12237944	0.325524	11.5588	8.61585	3.47108e-18	3.33319e-31
chr10_12238105_12238303	0.366471	13.3381	9.94214	1.3645e-23	6.95121e-41
chr10_124605236_124605434	0.131881	3.14422	2.34369	0.00954694	0.000832637
chr10_124713633_124713831	0.367942	13.402	9.98981	8.44525e-24	2.94214e-41
chr10_124768195_124768393	0.27409	9.32376	6.94989	1.82783e-12	5.61458e-21
chr10_124913825_124914023	0.255313	8.5078	6.34168	1.13635e-10	8.86306e-18
chr10_126107400_126107598	0.118867	2.57869	1.92214	0.0272938	0.0049588
chr10_127512021_127512219	0.604267	23.6713	17.6445	5.6096e-70	3.56312e-124
chr10_131776322_131776520	0.0232559	-1.57599	-1.17473	0.879949	0.942485
chr10_13628874_13629072	0.165912	4.62299	3.44596	0.000284522	1.89128e-06
chr10_14879926_14880124	0.0977653	1.66175	1.23866	0.107736	0.0482818
chr10_14880262_14880460	0.0486122	-0.474151	-0.353431	0.638117	0.682304
chr10_14880362_14880560	0.245615	8.08643	6.02759	8.32108e-10	3.07202e-16
chr10_15902390_15902588	0.351061	12.6685	9.44303	1.81071e-21	4.42074e-37
chr10_16478877_16479075	0.357343	12.9414	9.6465	2.54304e-22	1.31321e-38
chr10_16859308_16859506	0.306002	10.7105	7.98355	7.1091e-16	4.54436e-27
chr10_17686111_17686309	0.0842105	1.07274	0.799613	0.211968	0.141695
chr10_18429617_18429815	0.0421053	-0.756903	-0.564193	0.713689	0.775446
chr10_24755375_24755573	0.0175439	-1.82419	-1.35975	0.913045	0.965939
chr10_25013456_25013654	0.189756	5.65912	4.21828	1.23085e-05	7.60773e-09
chr10_26223083_26223281	0.338029	12.1021	9.02089	9.32827e-20	5.14437e-34
chr10_26505265_26505463	0.0562599	-0.141827	-0.105717	0.542097	0.556392
chr10_27149766_27149964	0.0807734	0.923381	0.688285	0.245637	0.177904
chr10_27149966_27150164	0.884376	35.8431	26.7173	1.48081e-157	1.17694e-281
chr10_27443188_27443386	0.203705	6.26524	4.67009	1.50535e-06	1.86121e-10
chr10_27443995_27444193	0.0652182	0.247445	0.184444	0.426832	0.402282
chr10_27793103_27793301	0.981057	40.0443	29.8489	4.54255e-196	0
chr10_29698408_29698606	0.419266	15.6322	11.6522	1.11817e-31	2.19635e-55
chr10_32048922_32049120	0.340993	12.231	9.11691	3.86466e-20	1.06197e-34
chr10_3313245_3313443	0.0431859	-0.709946	-0.529191	0.701664	0.761131
chr10_35379430_35379628	0.396491	14.6426	10.9145	4.91185e-28	7.51171e-49
chr10_38146429_38146627	0.408589	15.1683	11.3064	6.10075e-30	2.86757e-52
chr10_38299517_38299715	0.161808	4.44465	3.31302	0.000461467	4.40181e-06
chr10_38383191_38383389	0.29907	10.4093	7.75902	4.27957e-15	1.12492e-25
chr10_38645220_38645418	0.180182	5.24309	3.90818	4.64975e-05	7.89555e-08
chr10_43278161_43278359	0.716666	28.5555	21.2851	7.79518e-101	1.20126e-179
chr10_43932506_43932704	0.0454578	-0.611224	-0.455604	0.675663	0.729474
chr10_45474113_45474311	0.590158	23.0582	17.1875	1.6475e-66	6.08617e-118
chr10_5005509_5005707	0.11576	2.44369	1.82152	0.0342642	0.00726895
chr10_5136497_5136695	0.0407137	-0.817373	-0.609266	0.728826	0.793142
chr10_51565118_51565316	0.32842	11.6846	8.70965	1.52406e-18	7.64037e-32
chr10_51623229_51623427	0.658882	26.0445	19.4135	2.9694e-84	7.76625e-150
chr10_52645302_52645500	0.160088	4.36993	3.25733	0.000562335	6.21441e-06
chr10_53459260_53459458	0.242716	7.96043	5.93367	1.48118e-09	8.57234e-16
chr10_5406846_5407044	0.167532	4.69337	3.49842	0.00023401	1.34368e-06
chr10_5406946_5407144	0.0285716	-1.345	-1.00255	0.841962	0.910687
chr10_5407046_5407244	0.0620675	0.110536	0.0823928	0.467167	0.455992
chr10_560034_560232	0.526319	20.2841	15.1197	6.00496e-52	8.8829e-92
chr10_5855356_5855554	0.0289855	-1.32701	-0.989147	0.838704	0.907747
chr10_5855456_5855654	0.764971	30.6545	22.8497	7.34898e-116	1.15067e-206
chr10_60028856_60029054	0.163241	4.50691	3.35944	0.00039051	3.28888e-06
chr10_60145097_60145295	0.370117	13.4965	10.0603	4.13894e-24	8.19579e-42
chr10_61633015_61633213	0.124548	2.82555	2.10615	0.0175955	0.00235998
chr10_63809023_63809221	0.0283763	-1.35348	-1.00888	0.843484	0.912049
chr10_65028617_65028815	0.0992293	1.72536	1.28608	0.0992076	0.0422309
chr10_65028717_65028915	0.146386	3.77451	2.8135	0.00245023	8.01613e-05
chr10_65028817_65029015	0.0476193	-0.517298	-0.385592	0.650101	0.697526
chr10_68685743_68685941	0.188926	5.62303	4.19139	1.38628e-05	9.38173e-09
chr10_695914_696112	0.253312	8.42085	6.27687	1.72729e-10	1.8688e-17
chr10_69597742_69597940	0.0851052	1.11162	0.828594	0.203667	0.133152
chr10_69597842_69598040	0.0263162	-1.443	-1.07561	0.858949	0.92549
chr10_69597942_69598140	0.164062	4.54262	3.38605	0.000354531	2.77797e-06
chr10_70480881_70481079	0.443863	16.7011	12.4489	7.08911e-36	6.43821e-63
chr10_70660982_70661180	0.0765074	0.738005	0.550106	0.291123	0.230256
chr10_71930143_71930341	0.344838	12.398	9.24144	1.21603e-20	1.33925e-35
chr10_73565804_73566002	0.291667	10.0876	7.51923	2.75508e-14	3.13554e-24
chr10_73610937_73611135	0.103704	1.91979	1.431	0.0762144	0.0274421
chr10_73975930_73976128	0.0968538	1.62214	1.20914	0.113305	0.0523867
chr10_74927686_74927884	0.0281205	-1.3646	-1.01717	0.845463	0.91381
chr10_75012277_75012475	0.512451	19.6815	14.6705	4.98068e-49	1.55403e-86
chr10_75602051_75602249	0.104193	1.94105	1.44685	0.0739689	0.0261258
chr10_75757758_75757956	0.0249996	-1.50021	-1.11825	0.86827	0.93322
chr10_75910463_75910661	0.117348	2.51268	1.87295	0.030538	0.00599082
chr10_7829825_7830023	0.128208	2.98461	2.22472	0.0130501	0.0014197
chr10_7830025_7830223	0.303361	10.5957	7.89799	1.4172e-15	1.56009e-26
chr10_79789164_79789362	0.252098	8.36813	6.23757	2.22212e-10	2.92707e-17
chr10_79793523_79793721	0.137047	3.36869	2.51101	0.00601931	0.000377629
chr10_85899193_85899391	0.717894	28.6088	21.3249	3.33492e-101	2.60987e-180
chr10_90712417_90712615	0.172652	4.91588	3.66428	0.00012402	4.41928e-07
chr10_91011477_91011675	0.187499	5.56104	4.14518	1.69773e-05	1.34083e-08
chr10_92631640_92631838	2.09998	88.666	66.0913	0	0
chr10_93169354_93169552	0.0408164	-0.81291	-0.60594	0.727723	0.791865
chr10_93392710_93392908	0.207651	6.43673	4.79791	8.01632e-07	6.1037e-11
chr10_94050682_94050880	0.0824739	0.997276	0.743365	0.22863	0.159315
chr10_97416347_97416545	0.074364	0.644868	0.480682	0.315371	0.259507
chr10_97453596_97453794	0.244592	8.04194	5.99443	1.02102e-09	4.42152e-16
chr10_98141016_98141214	0.095548	1.5654	1.16684	0.121637	0.0587449
chr10_99160935_99161133	0.199321	6.07476	4.52811	2.97575e-06	6.20851e-10
chr10_99205655_99205853	0.0409836	-0.805644	-0.600524	0.725921	0.789776
chr10_99393138_99393336	0.206497	6.38656	4.76051	9.65499e-07	8.4831e-11
chr11_101000383_101000581	0.391061	14.4066	10.7386	3.35109e-27	2.35056e-47
chr11_1017267_1017465	0.152284	4.03081	3.00455	0.00132988	2.77927e-05
chr11_1017567_1017765	0.382075	14.0161	10.4476	7.51561e-26	6.20894e-45
chr11_10177782_10177980	0.120439	2.64699	1.97306	0.0242446	0.00406058
chr11_101785663_101785861	0.0377331	-0.946892	-0.70581	0.759847	0.828153
chr11_101785878_101786076	0.285733	9.82968	7.32701	1.17673e-13	4.19404e-23
chr11_1017881_1018079	0.138889	3.44872	2.57066	0.00507523	0.000281627
chr11_1017981_1018179	0.0396395	-0.864049	-0.644059	0.740231	0.80622
chr11_1018081_1018279	0.441178	16.5844	12.3619	2.09969e-35	4.51961e-62
chr11_1018267_1018465	0.0701759	0.462878	0.345028	0.365037	0.321726
chr11_1018467_1018665	0.0530986	-0.2792	-0.208115	0.58243	0.609954
chr11_1018567_1018765	0.119659	2.6131	1.94779	0.0257199	0.00448629
chr11_102401375_102401573	0.026929	-1.41637	-1.05576	0.854461	0.921667
chr11_102668759_102668957	0.135545	3.30341	2.46235	0.00690155	0.000477587
chr11_102962756_102962954	0.242856	7.9665	5.9382	1.44088e-09	8.16176e-16
chr11_10326554_10326752	0.0352466	-1.05494	-0.786349	0.784168	0.854274
chr11_10476723_10476921	0.142071	3.58701	2.67374	0.00375052	0.000167248
chr11_105145210_105145408	0.0434814	-0.697104	-0.519618	0.698335	0.757131
chr11_105892842_105893040	0.138222	3.41974	2.54906	0.00540065	0.000313403
chr11_105947955_105948153	0.0600518	0.0229431	0.0171017	0.493178	0.490848
chr11_10772489_10772687	0.112783	2.31432	1.72509	0.042256	0.0103251
chr11_10772719_10772917	0.26389	8.88051	6.61949	1.80214e-11	3.32782e-19
chr11_107799218_107799416	0.269332	9.11701	6.79578	5.3864e-12	3.86143e-20
chr11_107879961_107880159	0.358335	12.9845	9.67861	1.85864e-22	7.48848e-39
chr11_108093245_108093443	0.243094	7.97685	5.94592	1.37457e-09	7.50546e-16
chr11_108093679_108093877	0.545455	21.1156	15.7395	4.0536e-56	2.85716e-99
chr11_10830350_10830548	0.0709474	0.496403	0.370017	0.355685	0.309805
chr11_10830450_10830648	0.319999	11.3187	8.43691	1.62918e-17	5.30197e-30
chr11_10879499_10879697	0.158475	4.29984	3.20508	0.000675117	8.54611e-06
chr11_10879686_10879884	0.104349	1.94782	1.4519	0.0732653	0.0257184
chr11_111750142_111750340	0.249377	8.24987	6.14942	3.88833e-10	7.92837e-17
chr11_111782371_111782569	0.373832	13.6579	10.1806	1.21063e-24	9.05158e-43
chr11_111944935_111945133	0.205891	6.36023	4.74089	1.06389e-06	1.00723e-10
chr11_111957379_111957577	0.33394	11.9245	8.88845	3.09841e-19	4.41255e-33
chr11_111957513_111957711	0.567073	22.0551	16.4397	4.96656e-61	4.27183e-108
chr11_112832068_112832266	0.0280473	-1.36778	-1.01954	0.846026	0.914309
chr11_113930341_113930539	0.0294117	-1.30849	-0.975343	0.835305	0.904646
chr11_114167087_114167285	0.0215519	-1.65003	-1.22992	0.890637	0.950531
chr11_114271151_114271349	0.696078	27.6608	20.6183	9.40636e-95	1.0336e-168
chr11_114271251_114271449	0.0243897	-1.52672	-1.13801	0.872441	0.936584
chr11_114271351_114271549	0.0967712	1.61855	1.20646	0.11382	0.052772
chr11_114650110_114650308	0.178747	5.18074	3.8617	5.62998e-05	1.10504e-07
chr11_117698715_117698913	0.296297	10.2887	7.66919	8.65445e-15	3.96023e-25
chr11_117840246_117840444	0.0290207	-1.32548	-0.988006	0.838425	0.907494
chr11_118122939_118123137	0.0670523	0.327143	0.243851	0.403673	0.37178
chr11_118230226_118230424	2.52847	107.285	79.9702	0	0
chr11_118272233_118272431	0.0285717	-1.34499	-1.00255	0.841961	0.910686
chr11_118436574_118436772	0.018183	-1.79642	-1.33905	0.909722	0.963786
chr11_118661557_118661755	0.385322	14.1572	10.5527	2.46683e-26	8.42583e-46
chr11_118888954_118889152	0.0854711	1.12751	0.840445	0.200329	0.129762
chr11_118889383_118889581	0.0576923	-0.0795853	-0.0593225	0.523652	0.531716
chr11_118938422_118938620	1.26975	52.5894	39.1999	0	0
chr11_118955515_118955713	0.297734	10.3512	7.71574	6.01389e-15	2.06634e-25
chr11_118972456_118972654	0.258993	8.66772	6.46088	5.20464e-11	2.2043e-18
chr11_118992203_118992401	0.216338	6.8142	5.07928	1.89436e-07	4.73947e-12
chr11_119205156_119205354	0.27454	9.34333	6.96448	1.64805e-12	4.66739e-21
chr11_122932742_122932940	0.150943	3.97254	2.96112	0.00153262	3.55548e-05
chr11_123986056_123986254	0.225107	7.19525	5.36331	4.08554e-08	3.11737e-13
chr11_124492691_124492889	0.976089	39.8284	29.688	5.49296e-194	0
chr11_125772978_125773176	0.10498	1.97524	1.47233	0.0704656	0.0241207
chr11_14521278_14521476	0.462035	17.4907	13.0375	3.74234e-39	8.42838e-69
chr11_14541827_14542025	0.393101	14.4953	10.8047	1.63471e-27	6.48884e-48
chr11_16418963_16419161	0.0348262	-1.07321	-0.799964	0.788134	0.858411
chr11_16760121_16760319	0.749991	30.0035	22.3645	4.36037e-111	4.41112e-198
chr11_17098905_17099103	0.0309295	-1.24253	-0.92618	0.822824	0.89298
chr11_17229403_17229601	0.641037	25.2691	18.8355	1.93354e-79	3.49544e-141
chr11_17435004_17435202	0.0807388	0.921876	0.687163	0.24599	0.178297
chr11_18343612_18343810	0.641969	25.3096	18.8656	1.09288e-79	1.2534e-141
chr11_18610143_18610341	0.344768	12.395	9.23918	1.24199e-20	1.39087e-35
chr11_18655843_18656041	0.67646	26.8083	19.9828	3.88556e-89	1.2922e-158
chr11_22647264_22647462	0.191985	5.75595	4.29046	8.91503e-06	4.30776e-09
chr11_2292673_2292871	0.166391	4.64379	3.46147	0.000268621	1.71034e-06
chr11_27528194_27528392	0.333303	11.8968	8.86784	3.7289e-19	6.1474e-33
chr11_28131756_28131954	0.275588	9.38885	6.99841	1.29438e-12	3.03286e-21
chr11_30344565_30344763	0.21729	6.85556	5.1101	1.60991e-07	3.5518e-12
chr11_3078536_3078734	0.463217	17.5421	13.0758	2.26405e-39	3.41919e-69
chr11_308060_308258	0.105263	1.98756	1.48152	0.0692338	0.02343
chr11_31531041_31531239	0.0772728	0.771266	0.574899	0.28268	0.220275
chr11_31531238_31531436	1.05264	43.1548	32.1674	2.5209e-227	0
chr11_31825479_31825677	0.0794613	0.866366	0.645786	0.259209	0.193145
chr11_31832736_31832934	0.153059	4.06449	3.02965	0.00122418	2.40693e-05
chr11_31839385_31839583	0.0909027	1.36354	1.01638	0.154725	0.0863562
chr11_320715_320913	0.278965	9.5356	7.1078	5.89545e-13	7.45116e-22
chr11_32605287_32605485	0.650414	25.6765	19.1392	5.95639e-82	1.06913e-145
chr11_33743880_33744078	0.203241	6.24509	4.65507	1.61938e-06	2.11776e-10
chr11_3400276_3400474	0.315205	11.1103	8.28161	6.07602e-17	5.5861e-29
chr11_34127106_34127304	0.334538	11.9504	8.90782	2.60233e-19	3.22876e-33
chr11_34460398_34460596	0.109489	2.17119	1.6184	0.0527884	0.0149583
chr11_34642555_34642753	0.0681817	0.376222	0.280434	0.389572	0.353376
chr11_34645734_34645932	0.0395514	-0.86788	-0.646914	0.741156	0.80727
chr11_35160611_35160809	0.149528	3.91102	2.91526	0.00177696	4.59531e-05
chr11_35160911_35161109	0.0527884	-0.292677	-0.21816	0.586348	0.615115
chr11_36310858_36311056	0.333972	11.9259	8.88949	3.06948e-19	4.33905e-33
chr11_4115957_4116155	0.190964	5.71159	4.2574	1.03409e-05	5.59612e-09
chr11_43333460_43333658	0.0673403	0.33966	0.253181	0.400064	0.367056
chr11_43702223_43702421	0.0287825	-1.33583	-0.995723	0.840308	0.909198
chr11_43902292_43902490	0.0413222	-0.790933	-0.589558	0.722257	0.785508
chr11_45307902_45308100	0.102857	1.88299	1.40358	0.0802224	0.0298505
chr11_45939305_45939503	0.189786	5.66042	4.21926	1.22555e-05	7.55006e-09
chr11_46615484_46615682	0.191577	5.73826	4.27727	9.45977e-06	4.78279e-09
chr11_46639013_46639211	0.212265	6.63722	4.94736	3.76135e-07	1.59825e-11
chr11_46717585_46717783	0.145162	3.72131	2.77385	0.00276985	9.90955e-05
chr11_46722065_46722263	0.0368862	-0.983692	-0.73324	0.768294	0.837366
chr11_46867729_46867927	0.0254247	-1.48174	-1.10448	0.865308	0.930795
chr11_46958212_46958410	0.0634917	0.172423	0.128524	0.448867	0.431552
chr11_47447693_47447891	0.0919525	1.40916	1.05038	0.146772	0.0793946
chr11_47600424_47600622	0.172599	4.91358	3.66256	0.000124852	4.47141e-07
chr11_47600510_47600708	3.85107	164.758	122.81	0	0
chr11_57089696_57089894	0.151875	4.01301	2.99128	0.00138905	2.99749e-05
chr11_57298110_57298308	0.60001	23.4863	17.5066	6.3809e-69	2.81603e-122
chr11_57435606_57435804	0.367816	13.3965	9.98571	8.80157e-24	3.16831e-41
chr11_57479967_57480165	0.0638045	0.186017	0.138656	0.444861	0.426216
chr11_57508884_57509082	0.064516	0.216934	0.161702	0.43577	0.41413
chr11_57529232_57529430	0.301836	10.5294	7.84861	2.10338e-15	3.1602e-26
chr11_57529332_57529530	0.187549	5.5632	4.14679	1.68586e-05	1.32435e-08
chr11_57529432_57529630	0.1095	2.17167	1.61875	0.05275	0.0149403
chr11_60623332_60623530	0.518861	19.96	14.8781	2.28508e-50	6.12965e-89
chr11_60681554_60681752	0.113628	2.35105	1.75246	0.0398473	0.00936034
chr11_61129760_61129958	0.415265	15.4584	11.5226	5.07357e-31	3.31152e-54
chr11_61300834_61301032	0.0487897	-0.466439	-0.347682	0.63596	0.679549
chr11_61559951_61560149	0.399095	14.7557	10.9988	1.93519e-28	1.41347e-49
chr11_61976049_61976247	0.238851	7.79247	5.80848	3.15218e-09	3.28557e-15
chr11_62341254_62341452	0.235955	7.66662	5.71467	5.49581e-09	8.82913e-15
chr11_62358901_62359099	0.180302	5.24831	3.91207	4.57548e-05	7.67519e-08
chr11_62413977_62414175	0.372285	13.5907	10.1305	2.0235e-24	2.2729e-42
chr11_62432569_62432767	0.0857182	1.13825	0.848449	0.198094	0.127507
chr11_62446427_62446625	0.590278	23.0634	17.1914	1.54075e-66	5.39583e-118
chr11_62476889_62477087	0.483176	18.4094	13.7223	3.73335e-43	5.5223e-76
chr11_62495873_62496071	0.0317493	-1.20691	-0.899627	0.81584	0.886267
chr11_62528956_62529154	0.0422535	-0.750461	-0.559391	0.712052	0.773511
chr11_62572811_62573009	0.0904901	1.34561	1.00301	0.157927	0.089214
chr11_62599428_62599626	0.449959	16.9659	12.6464	5.85952e-37	7.3354e-65
chr11_62609121_62609319	0.0243512	-1.52839	-1.13926	0.872702	0.936792
chr11_62623495_62623693	0.122951	2.75616	2.05443	0.0199671	0.00292424
chr11_62648285_62648483	0.539008	20.8355	15.5307	1.07513e-54	1.0318e-96
chr11_63438792_63438990	0.0299272	-1.28609	-0.958647	0.831132	0.900794
chr11_63448914_63449112	0.179105	5.19627	3.87328	5.36897e-05	1.01661e-07
chr11_63449014_63449212	0.333334	11.8981	8.86882	3.69618e-19	6.05118e-33
chr11_63742017_63742215	0.669428	26.5028	19.7551	3.62867e-87	4.50326e-155
chr11_63753815_63754013	2.21722	93.7604	69.8886	0	0
chr11_63953566_63953764	0.0327285	-1.16436	-0.867911	0.807279	0.877861
chr11_63997949_63998147	0.140351	3.51226	2.61802	0.00442204	0.000222158
chr11_64084906_64085104	0.543976	21.0514	15.6916	8.6281e-56	1.1101e-98
chr11_64085663_64085861	0.187574	5.5643	4.14761	1.67982e-05	1.31601e-08
chr11_64085763_64085961	0.0508469	-0.377046	-0.281049	0.610664	0.64693
chr11_6426544_6426742	0.0260455	-1.45476	-1.08437	0.860901	0.927133
chr11_64703255_64703453	0.170157	4.80747	3.58347	0.000169531	7.64265e-07
chr11_64781540_64781738	0.176974	5.10369	3.80427	7.1111e-05	1.66546e-07
chr11_64863587_64863785	0.480765	18.3046	13.6442	1.09326e-42	3.80195e-75
chr11_64889526_64889724	0.30522	10.6765	7.9582	8.72825e-16	6.55847e-27
chr11_64889671_64889869	1.01818	41.6573	31.0512	5.5016e-212	0
chr11_64949325_64949523	0.0327231	-1.16459	-0.868084	0.807326	0.877908
chr11_6502625_6502823	0.375586	13.7342	10.2374	6.74158e-25	3.16959e-43
chr11_65186090_65186288	0.0297995	-1.29164	-0.962782	0.832171	0.901759
chr11_65186587_65186785	1.24333	51.4409	38.3439	0	0
chr11_65187559_65187757	0.0905216	1.34698	1.00403	0.157682	0.0889937
chr11_65188677_65188875	0.239244	7.80954	5.8212	2.92128e-09	2.86978e-15
chr11_65194762_65194960	0.177936	5.14548	3.83542	6.2674e-05	1.33416e-07
chr11_65194862_65195060	0.119658	2.61309	1.94779	0.0257201	0.00448636
chr11_65194962_65195160	0.126573	2.91354	2.17174	0.0149375	0.00178677
chr11_65195533_65195731	0.25926	8.67932	6.46953	4.91527e-11	1.99064e-18
chr11_65239495_65239693	0.105259	1.98739	1.48139	0.0692507	0.0234394
chr11_65265171_65265369	1.02632	42.011	31.3149	1.46425e-215	0
chr11_65265271_65265469	0.0659332	0.278514	0.207603	0.417769	0.390309
chr11_65265371_65265569	0.0341027	-1.10465	-0.8234	0.79486	0.865344
chr11_65337869_65338067	0.793326	31.8866	23.7682	3.56582e-125	2.04664e-223
chr11_65381606_65381804	0.253633	8.43484	6.28729	1.61523e-10	1.65832e-17
chr11_65383169_65383367	0.716343	28.5414	21.2747	9.74424e-101	1.79436e-179
chr11_65479623_65479821	1.92479	81.0531	60.4167	0	0
chr11_65625550_65625748	0.262768	8.83179	6.58318	2.30242e-11	5.15065e-19
chr11_65769522_65769720	0.0909089	1.36381	1.01658	0.154677	0.0863136
chr11_65769890_65770088	0.685141	27.1856	20.264	1.33633e-91	4.81121e-163
chr11_65819759_65819957	0.9068	36.8175	27.4436	4.13812e-166	4.84209e-297
chr11_66056641_66056839	0.296296	10.2887	7.66917	8.6556e-15	3.96117e-25
chr11_66056791_66056989	0.191566	5.73775	4.27689	9.47592e-06	4.7972e-09
chr11_66112450_66112648	0.320158	11.3256	8.44206	1.55898e-17	4.90019e-30
chr11_66206194_66206392	0.184627	5.43625	4.05216	2.53732e-05	2.72061e-08
chr11_66278038_66278236	0.270259	9.15727	6.82579	4.37213e-12	2.66143e-20
chr11_66360549_66360747	0.918748	37.3367	27.8306	9.23714e-171	2.08209e-305
chr11_66384014_66384212	0.227119	7.28267	5.42847	2.84193e-08	1.63642e-13
chr11_6640548_6640746	0.0214026	-1.65652	-1.23476	0.89154	0.951191
chr11_66406072_66406270	0.271186	9.19756	6.85582	3.54516e-12	1.8309e-20
chr11_66725753_66725951	0.0348263	-1.07321	-0.799963	0.788134	0.858411
chr11_67007476_67007674	0.208333	6.46637	4.82001	7.1777e-07	5.0193e-11
chr11_6704430_6704628	0.401183	14.8464	11.0665	9.12134e-29	3.66801e-50
chr11_67141463_67141661	0.228961	7.36271	5.48813	2.03102e-08	9.01089e-14
chr11_67351473_67351671	0.0266667	-1.42777	-1.06425	0.856393	0.923321
chr11_67798042_67798240	0.0966864	1.61487	1.20371	0.11435	0.0531699
chr11_71752039_71752237	0.302231	10.5466	7.8614	1.89926e-15	2.63306e-26
chr11_71823649_71823847	0.965446	39.366	29.3432	1.45789e-189	0
chr11_72145468_72145666	0.12076	2.66097	1.98348	0.023657	0.00389576
chr11_72433260_72433458	0.172067	4.89044	3.64531	0.000133534	5.03064e-07
chr11_73358589_73358787	0.15625	4.20314	3.133	0.000865138	1.3162e-05
chr11_73587794_73587992	0.105239	1.98652	1.48075	0.0693371	0.0234876
chr11_73882263_73882461	0.213969	6.71127	5.00256	2.82876e-07	9.64675e-12
chr11_73882363_73882561	0.0563624	-0.137375	-0.102398	0.54078	0.554633
chr11_73882463_73882661	0.047393	-0.527129	-0.39292	0.652811	0.700948
chr11_74660235_74660433	0.729927	29.1317	21.7146	7.45906e-105	7.12612e-187
chr11_75110473_75110671	0.805026	32.395	24.1471	4.00125e-129	1.6119e-230
chr11_75111652_75111850	0.160039	4.3678	3.25574	0.000565486	6.27524e-06
chr11_76155996_76156194	0.236821	7.70429	5.74275	4.65769e-09	6.5788e-15
chr11_77348723_77348921	0.172981	4.93018	3.67494	0.000118954	4.1077e-07
chr11_77790807_77791005	0.0937496	1.48725	1.10859	0.133804	0.0684745
chr11_82611362_82611560	0.070707	0.485955	0.362229	0.35859	0.313499
chr11_82782741_82782939	0.195489	5.90821	4.40396	5.31468e-06	1.72921e-09
chr11_82782841_82783039	0.43535	16.3311	12.1732	2.15975e-34	2.96288e-60
chr11_82782941_82783139	0.285152	9.80444	7.30819	1.35382e-13	5.38722e-23
chr11_82868110_82868308	0.111117	2.24193	1.67113	0.0473482	0.0124829
chr11_82904717_82904915	0.294932	10.2294	7.62497	1.2205e-14	7.32008e-25
chr11_82996917_82997115	0.0864189	1.1687	0.871144	0.191838	0.121262
chr11_85339545_85339743	0.264556	8.90945	6.64107	1.55707e-11	2.56429e-19
chr11_85358938_85359136	0.312944	11.0121	8.20839	1.12091e-16	1.67039e-28
chr11_86013225_86013423	0.0393701	-0.875758	-0.652786	0.743053	0.809419
chr11_86454400_86454598	0.0394733	-0.871273	-0.649443	0.741974	0.808197
chr11_86748867_86749065	0.0904893	1.34557	1.00299	0.157934	0.08922
chr11_86748967_86749165	0.222558	7.08448	5.28075	6.4329e-08	6.97812e-13
chr11_86749067_86749265	0.0852271	1.11691	0.832543	0.202551	0.132016
chr11_8704101_8704299	0.0825795	1.00186	0.746784	0.227597	0.158205
chr11_8704222_8704420	3.94401	168.796	125.82	0	0
chr11_8704665_8704863	0.300029	10.4509	7.79006	3.34879e-15	7.25674e-26
chr11_8832135_8832333	0.156717	4.22342	3.14812	0.000821627	1.20313e-05
chr11_89956106_89956304	0.0278767	-1.37519	-1.02506	0.847333	0.915464
chr11_93474748_93474946	0.023289	-1.57454	-1.17366	0.879734	0.942319
chr11_93517381_93517579	0.0905015	1.34611	1.00338	0.157838	0.0891341
chr11_94706633_94706831	0.517831	19.9153	14.8448	3.7603e-50	1.49969e-88
chr11_96074866_96075064	0.0480781	-0.497359	-0.370729	0.64458	0.690532
chr12_100660886_100661084	0.278755	9.52645	7.10098	6.19376e-13	8.13752e-22
chr12_100967126_100967324	0.0568183	-0.117565	-0.0876323	0.534916	0.546794
chr12_102455692_102455890	0.110806	2.2284	1.66104	0.0483525	0.0129269
chr12_10365439_10365637	0.258064	8.62738	6.43081	6.34613e-11	3.13872e-18
chr12_10365539_10365737	0.212195	6.63419	4.9451	3.80522e-07	1.63142e-11
chr12_104324196_104324394	0.10625	2.03044	1.51348	0.0650784	0.0211558
chr12_104324296_104324494	0.238804	7.79044	5.80697	3.18077e-09	3.33875e-15
chr12_104682589_104682787	0.0857116	1.13796	0.848234	0.198154	0.127568
chr12_105380019_105380217	0.263966	8.88382	6.62196	1.77228e-11	3.23014e-19
chr12_106696506_106696704	0.0877172	1.22512	0.913196	0.18057	0.110266
chr12_107380789_107380987	0.258635	8.65216	6.44929	5.61888e-11	2.52666e-18
chr12_10766065_10766263	0.595536	23.2919	17.3617	8.04674e-68	2.67852e-120
chr12_108079476_108079674	0.316881	11.1832	8.33593	3.84463e-17	2.46347e-29
chr12_108954830_108955028	0.0897378	1.31292	0.978647	0.163877	0.0946047
chr12_109531126_109531324	0.126126	2.89414	2.15728	0.0154919	0.001901
chr12_109569068_109569266	0.131579	3.13108	2.3339	0.00980052	0.000870809
chr12_109915017_109915215	0.22253	7.08327	5.27984	6.46466e-08	7.03938e-13
chr12_110034905_110035103	0.0435483	-0.694198	-0.517452	0.69758	0.756221
chr12_110486234_110486432	0.0420579	-0.758961	-0.565726	0.71421	0.776062
chr12_110562091_110562289	0.0642858	0.206928	0.154243	0.438709	0.418033
chr12_110841405_110841603	0.0875033	1.21582	0.90627	0.182396	0.112026
chr12_110888025_110888223	0.72094	28.7412	21.4235	4.0304e-102	5.84066e-182
chr12_110939788_110939986	0.0857144	1.13809	0.848325	0.198128	0.127542
chr12_112123776_112123974	0.960783	39.1633	29.1922	1.21812e-187	0
chr12_112451130_112451328	0.258666	8.65354	6.45031	5.58103e-11	2.49641e-18
chr12_112546481_112546679	0.330139	11.7593	8.76536	9.3091e-19	3.16167e-32
chr12_112847309_112847507	0.3272	11.6316	8.67014	2.15798e-18	1.42379e-31
chr12_11324096_11324294	0.136364	3.339	2.48888	0.00640736	0.000420403
chr12_113860107_113860305	0.280488	9.60176	7.15711	4.11963e-13	3.92951e-22
chr12_114404028_114404226	0.711897	28.3482	21.1307	2.07879e-99	4.40169e-177
chr12_118454443_118454641	0.16	4.36608	3.25446	0.000568045	6.32484e-06
chr12_119616664_119616862	0.0553631	-0.180796	-0.134764	0.553601	0.571736
chr12_120151491_120151689	0.0878118	1.22923	0.916261	0.179765	0.109493
chr12_120638798_120638996	0.0348837	-1.07071	-0.798103	0.787595	0.85785
chr12_120663720_120663918	0.175056	5.02032	3.74213	9.12345e-05	2.57926e-07
chr12_120729544_120729742	0.0551181	-0.191443	-0.142701	0.556737	0.575911
chr12_120730882_120731080	0.164866	4.57756	3.41209	0.00032233	2.35217e-06
chr12_120763773_120763971	0.117855	2.53472	1.88937	0.0294213	0.00562692
chr12_120763873_120764071	0.232759	7.52776	5.61116	1.00486e-08	2.58093e-14
chr12_120765518_120765716	0.210188	6.54698	4.8801	5.30173e-07	2.93555e-11
chr12_120875833_120876031	0.555582	21.5557	16.0675	2.15444e-58	2.34067e-103
chr12_120966855_120967053	0.166677	4.65623	3.47074	0.000259516	1.61025e-06
chr12_120972071_120972269	0.282692	9.69757	7.22853	2.44122e-13	1.5438e-22
chr12_121454173_121454371	0.355291	12.8522	9.58001	4.85158e-22	4.1774e-38
chr12_121790104_121790302	0.392157	14.4542	10.7741	2.28016e-27	1.17848e-47
chr12_122326601_122326799	0.172416	4.90561	3.65663	0.000127778	4.65676e-07
chr12_122750892_122751090	0.153554	4.086	3.04569	0.00116073	2.19433e-05
chr12_122985373_122985571	0.101872	1.84021	1.37169	0.0850806	0.0328686
chr12_123011395_123011593	0.603203	23.625	17.61	1.0323e-69	1.0663e-123
chr12_123717895_123718093	0.0920298	1.41252	1.05289	0.146197	0.0788986
chr12_124118264_124118462	1.35272	56.1945	41.8872	0	0
chr12_125399078_125399276	0.333329	11.8979	8.86867	3.70125e-19	6.06605e-33
chr12_12764728_12764926	0.107913	2.1027	1.56734	0.0585171	0.017746
chr12_12870238_12870436	0.0476351	-0.516608	-0.385078	0.64991	0.697285
chr12_12966200_12966398	0.366372	13.3338	9.93896	1.40874e-23	7.36027e-41
chr12_131118351_131118549	0.0646018	0.22066	0.164479	0.434677	0.412679
chr12_13349634_13349832	0.0532114	-0.274299	-0.204461	0.581003	0.608072
chr12_133758027_133758225	1.99847	84.2548	62.8032	0	0
chr12_14923881_14924079	0.120921	2.66796	1.98869	0.0233677	0.00381562
chr12_14923981_14924179	0.175439	5.03697	3.75454	8.68311e-05	2.36481e-07
chr12_14927237_14927435	0.0414947	-0.783434	-0.583969	0.720379	0.783314
chr12_14956313_14956511	0.0285706	-1.34504	-1.00259	0.84197	0.910694
chr12_14956550_14956748	0.0478632	-0.506698	-0.37769	0.64717	0.693817
chr12_15091363_15091561	0.30058	10.4749	7.80792	2.90693e-15	5.63504e-26
chr12_16035285_16035483	0.409886	15.2246	11.3484	3.77795e-30	1.2139e-52
chr12_16035385_16035583	0.0281249	-1.36441	-1.01702	0.845429	0.91378
chr12_16035485_16035683	0.039735	-0.8599	-0.640966	0.739228	0.805078
chr12_16035585_16035783	0.310073	10.8874	8.11541	2.42082e-16	6.62017e-28
chr12_2113554_2113752	0.122222	2.72449	2.03082	0.0211366	0.00322009
chr12_21525683_21525881	0.264704	8.91591	6.64588	1.50702e-11	2.41915e-19
chr12_21525783_21525981	0.115702	2.44119	1.81965	0.034406	0.0073195
chr12_21590507_21590705	0.158541	4.30268	3.2072	0.000670176	8.43741e-06
chr12_2163405_2163603	0.0465147	-0.565298	-0.421371	0.663258	0.714064
chr12_21654436_21654634	0.0974127	1.64643	1.22724	0.109866	0.049838
chr12_21654682_21654880	0.23438	7.59821	5.66368	7.4082e-09	1.50127e-14
chr12_21810656_21810854	0.0361448	-1.01591	-0.757255	0.775552	0.845164
chr12_22094206_22094404	0.0454573	-0.611243	-0.455618	0.675668	0.72948
chr12_2364955_2365153	0.0480765	-0.497427	-0.37078	0.644599	0.690556
chr12_2365155_2365353	0.0526313	-0.299507	-0.223251	0.58833	0.617723
chr12_24102523_24102721	0.253851	8.4443	6.29435	1.54345e-10	1.52933e-17
chr12_25102184_25102382	0.127662	2.96089	2.20703	0.0136559	0.00153378
chr12_27090796_27090994	0.0923073	1.42458	1.06187	0.144146	0.0771397
chr12_27175399_27175597	0.184315	5.42269	4.04205	2.64925e-05	2.9354e-08
chr12_28343303_28343501	0.147061	3.80384	2.83537	0.00228863	7.12338e-05
chr12_2921744_2921942	0.347314	12.5056	9.32164	5.72797e-21	3.47796e-36
chr12_29534005_29534203	0.11765	2.52583	1.88274	0.0298677	0.00577132
chr12_30848570_30848768	0.125	2.8452	2.1208	0.0169692	0.00221916
chr12_30848678_30848876	0.306826	10.7463	8.01021	5.72551e-16	3.086e-27
chr12_31478961_31479159	0.207256	6.41955	4.78511	8.54469e-07	6.83374e-11
chr12_32655036_32655234	0.12766	2.96077	2.20695	0.0136589	0.00153435
chr12_32687156_32687354	0.0851694	1.11441	0.830674	0.203079	0.132552
chr12_39299307_39299505	0.493433	18.8551	14.0545	3.61411e-45	1.33449e-79
chr12_41086180_41086378	0.24359	7.99842	5.96199	1.24589e-09	6.30106e-16
chr12_42719828_42720026	0.299626	10.4334	7.77701	3.71282e-15	8.72662e-26
chr12_44152687_44152885	0.0328947	-1.15714	-0.862528	0.805802	0.876393
chr12_46662703_46662901	0.0980413	1.67374	1.2476	0.106089	0.0470908
chr12_4713978_4714176	0.105894	2.01496	1.50195	0.0665554	0.0219542
chr12_4758188_4758386	3.5599	152.105	113.379	0	0
chr12_48499717_48499915	0.380396	13.9432	10.3932	1.33164e-25	1.73128e-44
chr12_48513024_48513222	0.146621	3.7847	2.8211	0.00239295	7.69465e-05
chr12_48551167_48551365	0.320515	11.3411	8.45363	1.41188e-17	4.10392e-30
chr12_49075916_49076114	0.322589	11.4312	8.5208	7.9229e-18	1.45963e-30
chr12_49110410_49110608	0.18543	5.47114	4.07816	2.26965e-05	2.2358e-08
chr12_49245828_49246026	0.384219	14.1093	10.517	3.60573e-26	1.66407e-45
chr12_49259522_49259720	0.0952389	1.55197	1.15683	0.123671	0.060335
chr12_49412465_49412663	0.375722	13.7401	10.2418	6.44028e-25	2.92018e-43
chr12_49582743_49582941	0.0321486	-1.18956	-0.886694	0.812378	0.882891
chr12_498331_498529	0.191985	5.75595	4.29047	8.91496e-06	4.30771e-09
chr12_50135252_50135450	0.308337	10.8119	8.05917	3.84075e-16	1.51125e-27
chr12_50222105_50222303	0.273763	9.30953	6.93929	1.97038e-12	6.41976e-21
chr12_50505901_50506099	0.172404	4.9051	3.65624	0.000127971	4.66907e-07
chr12_50616325_50616523	0.204712	6.30903	4.70272	1.28356e-06	1.40397e-10
chr12_51157788_51157986	0.0662684	0.293081	0.218462	0.413535	0.38473
chr12_51318703_51318901	0.058841	-0.0296687	-0.0221149	0.508822	0.511834
chr12_51442022_51442220	0.115132	2.41639	1.80117	0.0358381	0.00783758
chr12_52585688_52585886	0.0629922	0.150719	0.112345	0.455275	0.440099
chr12_53298681_53298879	0.0217391	-1.6419	-1.22386	0.889498	0.949694
chr12_53298781_53298979	0.0373134	-0.965129	-0.719404	0.764054	0.83276
chr12_53400126_53400324	0.227972	7.31977	5.45613	2.43317e-08	1.242e-13
chr12_53473067_53473265	0.700322	27.8452	20.7557	5.44152e-96	6.15207e-171
chr12_53689233_53689431	0.379393	13.8996	10.3607	1.87104e-25	3.18517e-44
chr12_53693412_53693610	0.774996	31.0901	23.1744	4.12241e-119	1.63876e-212
chr12_53773873_53774071	0.289157	9.97849	7.43793	5.1139e-14	9.4664e-24
chr12_53835419_53835617	0.216447	6.81894	5.08281	1.85944e-07	4.5857e-12
chr12_54069763_54069961	0.261455	8.77473	6.54065	3.06259e-11	8.56562e-19
chr12_54121136_54121334	0.186168	5.5032	4.10206	2.04743e-05	1.86482e-08
chr12_54674449_54674647	0.268448	9.07858	6.76714	6.56761e-12	5.49982e-20
chr12_54718841_54719039	1.04523	42.8327	31.9273	5.57632e-224	0
chr12_56109757_56109955	0.118422	2.55938	1.90775	0.0282119	0.00524302
chr12_56123371_56123569	0.0379259	-0.938511	-0.699563	0.7579	0.826009
chr12_56211391_56211589	0.3972	14.6734	10.9375	3.81415e-28	4.77252e-49
chr12_56211742_56211940	0.0917346	1.39969	1.04332	0.148399	0.0808031
chr12_56223267_56223465	1.10317	45.3508	33.8043	8.52107e-251	0
chr12_56367754_56367952	0.217099	6.84727	5.10393	1.66335e-07	3.76353e-12
chr12_56390976_56391174	0.184829	5.44503	4.0587	2.4673e-05	2.58984e-08
chr12_56435821_56436019	0.179481	5.21263	3.88548	5.10647e-05	9.30894e-08
chr12_56436127_56436325	0.264496	8.90686	6.63914	1.5776e-11	2.62488e-19
chr12_56473839_56474037	0.391535	14.4272	10.754	2.83782e-27	1.74464e-47
chr12_56498259_56498457	0.289254	9.98271	7.44107	4.99352e-14	9.07205e-24
chr12_56510320_56510518	0.75001	30.0044	22.3652	4.2984e-111	4.29903e-198
chr12_56510460_56510658	0.510265	19.5865	14.5997	1.41003e-48	1.00742e-85
chr12_56521946_56522144	0.204296	6.29094	4.68924	1.37112e-06	1.57779e-10
chr12_56615583_56615781	0.0594049	-0.00516663	-0.00385119	0.501536	0.502061
chr12_56624472_56624670	0.169334	4.77167	3.55679	0.000187709	9.13505e-07
chr12_56651485_56651683	0.0993557	1.73086	1.29017	0.0984953	0.0417388
chr12_56709732_56709930	0.033444	-1.13327	-0.844734	0.80087	0.871449
chr12_56709832_56710030	0.236487	7.68976	5.73192	4.96511e-09	7.37059e-15
chr12_56709932_56710130	0.0943389	1.51286	1.12768	0.129728	0.065158
chr12_56727649_56727847	0.0328615	-1.15858	-0.863604	0.806097	0.876687
chr12_56753813_56754011	0.71385	28.4331	21.1939	5.43356e-100	3.94328e-178
chr12_56881826_56882024	0.119196	2.59299	1.93281	0.02663	0.00475723
chr12_56915537_56915735	0.214427	6.73115	5.01737	2.61915e-07	8.41639e-12
chr12_57030046_57030244	0.34091	12.2274	9.11423	3.96173e-20	1.11021e-34
chr12_57039664_57039862	0.252156	8.37062	6.23943	2.19584e-10	2.8657e-17
chr12_57082128_57082326	0.0680782	0.371726	0.277083	0.390858	0.355048
chr12_57082228_57082426	0.036037	-1.0206	-0.760748	0.776596	0.846277
chr12_57118189_57118387	0.0765027	0.737803	0.549955	0.291175	0.230317
chr12_57119018_57119216	0.250276	8.28894	6.17854	3.23477e-10	5.71305e-17
chr12_57505043_57505241	0.183223	5.37524	4.00668	3.07891e-05	3.82412e-08
chr12_57623412_57623610	0.358654	12.9984	9.68897	1.67955e-22	6.24535e-39
chr12_57881757_57881955	0.222188	7.06841	5.26877	6.86712e-08	7.83573e-13
chr12_57914176_57914374	0.102157	1.85259	1.38092	0.0836525	0.0319704
chr12_58087849_58088047	0.247196	8.15513	6.0788	6.05431e-10	1.74408e-16
chr12_58138741_58138939	0.131949	3.14715	2.34588	0.00949123	0.000824344
chr12_58146020_58146218	0.232144	7.50105	5.59125	1.1272e-08	3.16552e-14
chr12_58165780_58165978	0.403843	14.9621	11.1527	3.47507e-29	6.49783e-51
chr12_62654074_62654272	1.48027	61.7373	46.0187	0	0
chr12_6602334_6602532	0.34495	12.4029	9.24509	1.17525e-20	1.25988e-35
chr12_6643563_6643761	0.434781	16.3064	12.1548	2.70629e-34	4.44146e-60
chr12_6643886_6644084	0.477284	18.1533	13.5314	5.10116e-42	6.04144e-74
chr12_66563664_66563862	0.180041	5.23696	3.90361	4.73847e-05	8.16227e-08
chr12_6772186_6772384	0.689897	27.3922	20.4181	5.77659e-93	1.69626e-165
chr12_6798543_6798741	0.558824	21.6966	16.1726	3.93734e-59	1.10429e-104
chr12_69080672_69080870	0.459621	17.3858	12.9593	1.04045e-38	5.28379e-68
chr12_69202704_69202902	0.279508	9.5592	7.12539	5.18918e-13	5.93326e-22
chr12_6961213_6961411	0.375005	13.7089	10.2186	8.18548e-25	4.48823e-43
chr12_6976604_6976802	0.0473937	-0.527101	-0.392899	0.652803	0.700938
chr12_69979149_69979347	0.315058	11.104	8.27687	6.3225e-17	5.99792e-29
chr12_7052909_7053107	0.0273972	-1.39603	-1.04059	0.850968	0.918647
chr12_7053130_7053328	0.315393	11.1185	8.2877	5.77279e-17	5.09727e-29
chr12_70636727_70636925	0.202959	6.23284	4.64594	1.69268e-06	2.29022e-10
chr12_70637030_70637228	0.162163	4.46009	3.32453	0.000442832	4.09625e-06
chr12_7072281_7072479	0.0949402	1.53899	1.14715	0.125659	0.0619037
chr12_7079733_7079931	0.312942	11.012	8.20832	1.1215e-16	1.67194e-28
chr12_7079985_7080183	1.07886	44.2943	33.0168	2.33284e-239	0
chr12_7167943_7168141	0.04	-0.848386	-0.632384	0.736432	0.801888
chr12_72056666_72056864	0.119173	2.59201	1.93208	0.0266751	0.00477083
chr12_72057500_72057698	0.0729191	0.582082	0.433882	0.332187	0.280256
chr12_72233457_72233655	0.51562	19.8192	14.7732	1.09114e-49	1.01634e-87
chr12_7244946_7245144	0.04	-0.848385	-0.632383	0.736432	0.801888
chr12_7282893_7283091	0.313289	11.0271	8.21956	1.02125e-16	1.41411e-28
chr12_74335843_74336041	0.0542	-0.231337	-0.172438	0.568453	0.591474
chr12_74931651_74931849	0.253026	8.40843	6.26761	1.83315e-10	2.07768e-17
chr12_74931751_74931949	0.319143	11.2815	8.40917	2.06457e-17	8.09973e-30
chr12_75874471_75874669	0.0966178	1.61188	1.20149	0.11478	0.0534937
chr12_75905285_75905483	0.220371	6.98947	5.20993	9.44584e-08	1.37961e-12
chr12_76478461_76478659	0.0612521	0.0751035	0.0559819	0.477678	0.470066
chr12_76478561_76478759	0.130414	3.08047	2.29617	0.010833	0.00103335
chr12_76742082_76742280	0.128206	2.9845	2.22463	0.013053	0.00142023
chr12_80084215_80084413	0.241666	7.91482	5.89967	1.8211e-09	1.23807e-15
chr12_8088657_8088855	0.13725	3.3775	2.51758	0.00590824	0.000365735
chr12_8234772_8234970	2.08658	88.0835	65.6571	0	0
chr12_88535757_88535955	0.026738	-1.42467	-1.06194	0.855869	0.922874
chr12_89746169_89746367	0.0232561	-1.57598	-1.17473	0.879948	0.942484
chr12_89918456_89918654	0.0680271	0.369503	0.275426	0.391495	0.355877
chr12_9102134_9102332	0.399949	14.7928	11.0265	1.42343e-28	8.1483e-50
chr12_91505151_91505349	0.126148	2.8951	2.15799	0.0154642	0.00189521
chr12_92539510_92539708	0.115003	2.41079	1.79699	0.0361683	0.00795899
chr12_93637196_93637394	0.24341	7.99058	5.95615	1.29128e-09	6.7154e-16
chr12_93861193_93861391	1.01975	41.7257	31.1022	1.1242e-212	0
chr12_95611479_95611677	0.273588	9.30193	6.93362	2.05097e-12	6.89581e-21
chr12_96252644_96252842	0.288855	9.96535	7.42813	5.50709e-14	1.08057e-23
chr12_96429274_96429472	0.0409837	-0.805638	-0.600519	0.72592	0.789774
chr13_100153654_100153852	0.0148696	-1.9404	-1.44637	0.925963	0.973835
chr13_103498334_103498532	0.0415769	-0.779865	-0.581308	0.719484	0.782265
chr13_107069240_107069438	0.424694	15.8681	11.828	1.398e-32	5.26707e-57
chr13_111365515_111365713	0.0588218	-0.0305047	-0.022738	0.50907	0.512168
chr13_111805925_111806123	0.660378	26.1095	19.4619	1.15428e-84	1.42071e-150
chr13_113777025_113777223	0.15254	4.04193	3.01284	0.00129408	2.65064e-05
chr13_21714616_21714814	0.0437147	-0.686969	-0.512064	0.695697	0.753949
chr13_21750713_21750911	0.361903	13.1396	9.79419	5.96225e-23	9.76501e-40
chr13_25861517_25861715	0.184221	5.41858	4.03899	2.68414e-05	3.00376e-08
chr13_25861617_25861815	0.0568121	-0.117833	-0.0878321	0.534995	0.5469
chr13_26795867_26796065	0.378167	13.8463	10.321	2.83167e-25	6.69468e-44
chr13_27825298_27825496	0.2824	9.68485	7.21905	2.61766e-13	1.74866e-22
chr13_27825390_27825588	0.147363	3.81695	2.84514	0.0022196	6.75559e-05
chr13_27825635_27825833	0.161295	4.42235	3.2964	0.000489654	4.88158e-06
chr13_28024605_28024803	0.133748	3.22535	2.40416	0.00810475	0.000629092
chr13_30423842_30424040	0.173804	4.96592	3.70158	0.000107132	3.41885e-07
chr13_31039933_31040131	0.0348841	-1.07069	-0.798089	0.787591	0.857846
chr13_31191593_31191791	0.0365258	-0.999352	-0.744913	0.771838	0.841188
chr13_31735917_31736115	0.0373831	-0.962102	-0.717147	0.763358	0.832001
chr13_31736029_31736227	0.0548001	-0.205261	-0.153001	0.560801	0.581316
chr13_32519935_32520133	0.0214289	-1.65538	-1.23391	0.891382	0.951076
chr13_33112818_33113016	0.0447756	-0.640866	-0.477699	0.683568	0.739195
chr13_38923909_38924107	0.162803	4.48789	3.34525	0.000411037	3.59665e-06
chr13_38935673_38935871	0.124995	2.84499	2.12065	0.0169757	0.00222061
chr13_39612422_39612620	0.0870028	1.19407	0.890057	0.186718	0.116225
chr13_41345206_41345404	0.102941	1.88665	1.40631	0.0798168	0.0296034
chr13_41593352_41593550	0.0612276	0.0740367	0.0551867	0.477995	0.470491
chr13_43597654_43597852	0.0521275	-0.321399	-0.23957	0.594668	0.626046
chr13_45009515_45009713	0.414495	15.4249	11.4977	6.77646e-31	5.56555e-54
chr13_45010857_45011055	0.440676	16.5626	12.3457	2.56924e-35	6.49238e-62
chr13_45563483_45563681	0.038961	-0.893533	-0.666036	0.747306	0.814214
chr13_45915179_45915377	0.0256412	-1.47233	-1.09747	0.863782	0.929535
chr13_46626776_46626974	0.464584	17.6015	13.1201	1.26324e-39	1.19952e-69
chr13_46948625_46948823	0.140969	3.53913	2.63806	0.00416913	0.000200721
chr13_47371181_47371379	0.13528	3.29191	2.45377	0.00706828	0.000497553
chr13_48669134_48669332	0.480376	18.2877	13.6316	1.29948e-42	5.18508e-75
chr13_49550863_49551061	0.0295568	-1.30218	-0.970644	0.834137	0.903573
chr13_49821987_49822185	0.0409833	-0.805656	-0.600533	0.725924	0.789779
chr13_50018348_50018546	0.259614	8.6947	6.48099	4.55601e-11	1.73876e-18
chr13_52027052_52027250	0.156859	4.22961	3.15273	0.000808752	1.1705e-05
chr13_52586433_52586631	0.641912	25.3071	18.8638	1.13162e-79	1.33441e-141
chr13_52768443_52768641	0.0807189	0.921012	0.686519	0.246193	0.178522
chr13_53191553_53191751	0.132302	3.1625	2.35731	0.00920386	0.000782111
chr13_53226913_53227111	0.0942435	1.50871	1.12459	0.130382	0.0656865
chr13_53602877_53603075	0.0964403	1.60417	1.19574	0.115899	0.0543383
chr13_55015344_55015542	0.116217	2.46357	1.83633	0.0331542	0.00687813
chr13_56756455_56756653	0.0704484	0.474717	0.353852	0.361725	0.317494
chr13_71204049_71204247	0.0595238	0	0	0.5	0.5
chr13_72441288_72441486	0.128787	3.00978	2.24348	0.0124329	0.00130718
chr13_73356234_73356432	0.0268431	-1.42011	-1.05854	0.855096	0.922212
chr13_76111878_76112076	0.287814	9.92012	7.39442	7.10138e-14	1.70172e-23
chr13_76334755_76334953	0.23546	7.64514	5.69866	6.03775e-09	1.0436e-14
chr13_76334855_76335053	0.0309274	-1.24262	-0.926247	0.822841	0.892997
chr13_77903682_77903880	0.0305675	-1.25827	-0.937907	0.825854	0.895852
chr13_78492823_78493021	0.129625	3.04617	2.2706	0.0115856	0.0011589
chr13_78493502_78493700	0.204342	6.29292	4.69072	1.36124e-06	1.55774e-10
chr13_80055557_80055755	0.0291262	-1.3209	-0.98459	0.837587	0.906732
chr13_95248312_95248510	0.205479	6.34235	4.72756	1.13615e-06	1.13142e-10
chr13_97842594_97842792	0.215593	6.78183	5.05515	2.15028e-07	5.93319e-12
chr14_100842516_100842714	0.0940757	1.50142	1.11915	0.131538	0.0666236
chr14_101292393_101292591	0.0374995	-0.957044	-0.713377	0.762194	0.830727
chr14_102606132_102606330	0.653715	25.82	19.2461	7.61015e-83	2.64643e-147
chr14_102771387_102771585	0.197488	5.9951	4.46873	3.93434e-06	1.01678e-09
chr14_102829115_102829313	0.53397	20.6166	15.3675	1.35153e-53	9.74133e-95
chr14_104515671_104515869	0.080645	0.917802	0.684126	0.246948	0.179361
chr14_106403215_106403413	0.0332315	-1.14251	-0.851619	0.802787	0.873378
chr14_20801347_20801545	0.296296	10.2887	7.66917	8.65581e-15	3.96134e-25
chr14_20811330_20811528	0.0680268	0.369491	0.275417	0.391498	0.355881
chr14_20811430_20811628	0.0521729	-0.319425	-0.238098	0.594097	0.625298
chr14_20881514_20881712	0.272301	9.24601	6.89194	2.75177e-12	1.1651e-20
chr14_20922865_20923063	0.298032	10.3641	7.72538	5.57592e-15	1.80514e-25
chr14_20923288_20923486	0.293328	10.1597	7.57302	1.8232e-14	1.49954e-24
chr14_20937488_20937686	0.0491808	-0.449441	-0.335012	0.631192	0.673443
chr14_21152642_21152840	0.0416655	-0.776012	-0.578436	0.718515	0.781129
chr14_21270918_21271116	0.233333	7.5527	5.62976	9.02328e-09	2.13158e-14
chr14_21458062_21458260	0.339961	12.1861	9.08347	5.25821e-20	1.84316e-34
chr14_21737470_21737668	0.0709184	0.495141	0.369076	0.356035	0.31025
chr14_21852045_21852243	0.248686	8.21984	6.12704	4.47645e-10	1.01883e-16
chr14_21905323_21905521	0.0520827	-0.323346	-0.241021	0.59523	0.626783
chr14_21924158_21924356	0.25198	8.36299	6.23374	2.27713e-10	3.05738e-17
chr14_21944697_21944895	0.0677413	0.357086	0.266171	0.395054	0.360514
chr14_21944969_21945167	0.0500858	-0.410116	-0.305699	0.620083	0.65914
chr14_21979337_21979535	0.0845082	1.08567	0.809256	0.209184	0.138812
chr14_23058001_23058199	0.0426619	-0.732716	-0.546163	0.707523	0.768134
chr14_23235816_23236014	0.212854	6.66281	4.96643	3.40983e-07	1.34323e-11
chr14_23305696_23305894	0.470911	17.8764	13.325	8.28099e-41	9.00324e-72
chr14_23388249_23388447	0.112243	2.29086	1.7076	0.0438557	0.0109859
chr14_23398499_23398697	0.0268296	-1.42069	-1.05898	0.855195	0.922297
chr14_23503980_23504178	0.0966919	1.61511	1.20389	0.114315	0.0531439
chr14_23564225_23564423	0.174647	5.00257	3.7289	9.61594e-05	2.82851e-07
chr14_23623507_23623705	0.135592	3.30548	2.46389	0.00687185	0.000474066
chr14_23652739_23652937	0.176471	5.08181	3.78796	7.59452e-05	1.86932e-07
chr14_23821992_23822190	0.365344	13.2891	9.90566	1.96678e-23	1.33844e-40
chr14_23938804_23939002	1.34659	55.9282	41.6887	0	0
chr14_24025398_24025596	0.0227275	-1.59895	-1.19185	0.88334	0.945084
chr14_24036886_24037084	0.378053	13.8414	10.3173	2.94247e-25	7.17151e-44
chr14_24422871_24423069	0.0909088	1.36381	1.01658	0.154678	0.0863144
chr14_24584372_24584570	0.216666	6.82844	5.08989	1.79131e-07	4.29205e-12
chr14_24584572_24584770	0.0754659	0.692749	0.516372	0.302797	0.244234
chr14_24605312_24605510	0.0895589	1.30515	0.972851	0.165314	0.0959216
chr14_24630392_24630590	0.290334	10.0296	7.47604	3.82978e-14	5.64748e-24
chr14_24711719_24711917	0.091145	1.37407	1.02423	0.152864	0.0847098
chr14_24768982_24769180	0.0674152	0.342914	0.255607	0.399127	0.365831
chr14_24801411_24801609	0.0256423	-1.47228	-1.09743	0.863774	0.929528
chr14_24899761_24899959	0.152494	4.03994	3.01135	0.00130043	2.67329e-05
chr14_24911540_24911738	0.200124	6.10962	4.55409	2.63065e-06	4.99334e-10
chr14_24911861_24912059	0.387088	14.234	10.61	1.33939e-26	2.81886e-46
chr14_35008787_35008985	0.0858895	1.14569	0.853996	0.196554	0.125961
chr14_35452140_35452338	0.153404	4.07948	3.04083	0.00117964	2.25684e-05
chr14_35591686_35591884	0.148512	3.8669	2.88238	0.00197344	5.51127e-05
chr14_35761492_35761690	1.34737	55.9622	41.714	0	0
chr14_36789706_36789904	0.722581	28.8125	21.4767	1.28553e-102	7.48403e-183
chr14_37437161_37437359	0.028821	-1.33416	-0.994475	0.840004	0.908924
chr14_37667160_37667358	0.0557261	-0.165024	-0.123009	0.54895	0.565538
chr14_39583406_39583604	0.277865	9.48779	7.07216	7.627e-13	1.17994e-21
chr14_39639446_39639644	0.0495871	-0.43179	-0.321854	0.626219	0.667053
chr14_39644359_39644557	0.0618559	0.101342	0.0755397	0.469893	0.45964
chr14_39703025_39703223	0.340152	12.1944	9.08966	4.96724e-20	1.66455e-34
chr14_45431019_45431217	0.10203	1.84707	1.3768	0.0842874	0.0323686
chr14_45431324_45431522	0.232557	7.51898	5.60462	1.04356e-08	2.76019e-14
chr14_50052997_50053195	0.0880503	1.23959	0.923986	0.177747	0.107563
chr14_50053453_50053651	0.0988079	1.70705	1.27243	0.10161	0.0439061
chr14_50053553_50053751	0.0540025	-0.239922	-0.178837	0.570967	0.594804
chr14_50087228_50087426	0.765983	30.6985	22.8825	3.46758e-116	2.9809e-207
chr14_50320339_50320537	0.370273	13.5033	10.0653	3.93268e-24	7.47829e-42
chr14_50320539_50320737	0.0874318	1.21271	0.903953	0.18301	0.112619
chr14_50320639_50320837	0.133824	3.22866	2.40663	0.00805025	0.000621862
chr14_50329266_50329464	0.122849	2.75173	2.05113	0.0201272	0.00296406
chr14_50329466_50329664	0.122807	2.74991	2.04977	0.0201933	0.00298056
chr14_51706872_51707070	0.346775	12.4822	9.3042	6.75026e-21	4.66721e-36
chr14_52327281_52327479	0.480066	18.2743	13.6216	1.49065e-42	6.63413e-75
chr14_52327381_52327579	0.1445	3.69256	2.75242	0.00295785	0.000111005
chr14_52327481_52327679	0.0696479	0.439935	0.327926	0.371484	0.329992
chr14_53173828_53174026	0.0900892	1.32819	0.990026	0.161081	0.092058
chr14_54976498_54976696	0.320756	11.3516	8.46142	1.32065e-17	3.64164e-30
chr14_54976598_54976796	0.500001	19.1405	14.2672	1.7507e-46	5.80877e-82
chr14_55493853_55494051	0.387597	14.2561	10.6264	1.1228e-26	2.0546e-46
chr14_57735527_57735725	0.720744	28.7327	21.4172	4.61788e-102	7.45967e-182
chr14_57735627_57735825	0.358667	12.999	9.68937	1.67291e-22	6.20117e-39
chr14_57735727_57735925	0.15	3.93155	2.93056	0.00169176	4.22007e-05
chr14_57735827_57736025	0.0471667	-0.536965	-0.400252	0.655515	0.704354
chr14_57960467_57960665	0.195334	5.90149	4.39895	5.4389e-06	1.80119e-09
chr14_58711490_58711688	0.929579	37.8074	28.1815	4.93106e-175	0
chr14_58764725_58764923	0.210918	6.5787	4.90374	4.70146e-07	2.37284e-11
chr14_58765167_58765365	0.263157	8.8487	6.59578	2.11509e-11	4.42741e-19
chr14_58893752_58893950	0.0327293	-1.16433	-0.867886	0.807272	0.877854
chr14_59655330_59655528	0.149767	3.92142	2.92301	0.00173334	4.40152e-05
chr14_61201389_61201587	0.222924	7.10038	5.29259	6.02965e-08	6.22075e-13
chr14_62351524_62351722	0.124475	2.8224	2.10381	0.0176976	0.00238326
chr14_62584031_62584229	0.0365834	-0.99685	-0.743048	0.771274	0.840581
chr14_64009974_64010172	0.0703496	0.470427	0.350654	0.362924	0.319025
chr14_65381071_65381269	0.563948	21.9192	16.3385	2.62614e-60	8.51578e-107
chr14_65453510_65453708	0.163086	4.50017	3.35441	0.00039767	3.3949e-06
chr14_66975118_66975316	0.0732351	0.595811	0.444115	0.32848	0.275651
chr14_67826440_67826638	0.2003	6.11729	4.5598	2.56009e-06	4.75907e-10
chr14_67826969_67827167	0.172414	4.90552	3.65656	0.000127813	4.65897e-07
chr14_68162355_68162553	0.0550368	-0.194975	-0.145334	0.557776	0.577294
chr14_69864910_69865108	0.472399	17.9411	13.3732	4.33607e-41	2.81781e-72
chr14_69865333_69865531	0.394772	14.5679	10.8588	9.05232e-28	2.24844e-48
chr14_70233765_70233963	0.0742562	0.640183	0.47719	0.316614	0.261027
chr14_70826307_70826505	0.037037	-0.977138	-0.728355	0.766802	0.83575
chr14_70883653_70883851	0.219082	6.93342	5.16815	1.18214e-07	2.05389e-12
chr14_71067283_71067481	0.859397	34.7577	25.9082	2.68986e-148	5.30814e-265
chr14_73493704_73493902	0.049996	-0.414019	-0.308608	0.62119	0.66057
chr14_73603095_73603293	0.588235	22.9746	17.1252	4.81505e-66	4.18217e-117
chr14_73925154_73925352	0.0380954	-0.93115	-0.694075	0.756183	0.824112
chr14_74111605_74111803	0.199164	6.06792	4.523	3.04841e-06	6.47886e-10
chr14_74353465_74353663	1.13047	46.5369	34.6884	5.88916e-264	0
chr14_74551579_74551777	0.499998	19.1404	14.2672	1.75303e-46	5.82272e-82
chr14_74769551_74769749	0.0630632	0.153803	0.114644	0.454363	0.438882
chr14_74959957_74960155	0.127276	2.9441	2.19452	0.0140989	0.00161945
chr14_74960157_74960355	0.0343365	-1.09449	-0.815825	0.7927	0.863129
chr14_74960174_74960372	0.0257509	-1.46757	-1.09392	0.863004	0.928889
chr14_75179674_75179872	0.931045	37.8711	28.229	1.29026e-175	0
chr14_75469553_75469751	0.0487835	-0.466707	-0.347882	0.636035	0.679645
chr14_75643193_75643391	0.147335	3.81576	2.84425	0.00222581	6.78831e-05
chr14_75745456_75745654	0.129485	3.04011	2.26609	0.0117231	0.00118246
chr14_76127092_76127290	0.225119	7.19579	5.36372	4.07635e-08	3.10494e-13
chr14_76127515_76127713	0.145631	3.74171	2.78906	0.00264307	9.13847e-05
chr14_76448219_76448417	0.0250301	-1.49889	-1.11727	0.86806	0.933049
chr14_76452025_76452223	0.620401	24.3724	18.1671	4.70427e-74	1.67908e-131
chr14_76618190_76618388	0.0927834	1.44526	1.07729	0.140675	0.074192
chr14_78174256_78174454	0.421485	15.7286	11.7241	4.79737e-32	4.81233e-56
chr14_78174343_78174541	0.743754	29.7326	22.1625	3.94953e-109	1.45774e-194
chr14_78227406_78227604	0.165882	4.62168	3.44498	0.000285552	1.90326e-06
chr14_82000060_82000258	0.0592577	-0.0115602	-0.00861694	0.503438	0.504612
chr14_85996443_85996641	0.0454575	-0.611235	-0.455612	0.675665	0.729478
chr14_88490818_88491016	0.375763	13.7418	10.2431	6.35351e-25	2.85004e-43
chr14_88851972_88852170	0.349906	12.6183	9.4056	2.58662e-21	8.37373e-37
chr14_90849776_90849974	0.0322581	-1.1848	-0.883148	0.811422	0.881952
chr14_91580327_91580525	0.126191	2.89694	2.15937	0.0154109	0.00188412
chr14_92588217_92588415	0.152965	4.06041	3.02661	0.00123656	2.44938e-05
chr14_93388957_93389155	0.143921	3.6674	2.73367	0.00313165	0.000122513
chr14_93389057_93389255	0.424242	15.8484	11.8134	1.66467e-32	7.20459e-57
chr14_93389157_93389355	0.0512821	-0.358133	-0.266951	0.605246	0.639878
chr14_93673294_93673492	0.136122	3.32851	2.48106	0.00654959	0.000436553
chr14_94547430_94547628	0.224918	7.18703	5.35719	4.22639e-08	3.31071e-13
chr14_94854994_94855192	0.0919696	1.4099	1.05093	0.146644	0.0792846
chr14_94855094_94855292	0.092025	1.41231	1.05273	0.146233	0.0789295
chr14_94855194_94855392	0.134297	3.2492	2.42194	0.00771895	0.000578653
chr14_94856883_94857081	0.0283696	-1.35377	-1.0091	0.843536	0.912095
chr14_95027686_95027884	0.166882	4.66512	3.47736	0.000253185	1.54217e-06
chr14_95078650_95078848	0.0917428	1.40005	1.04359	0.148338	0.0807497
chr14_96671102_96671300	0.196624	5.95754	4.44073	4.48281e-06	1.28033e-09
chr14_96858372_96858570	0.0744542	0.648786	0.483602	0.314334	0.258239
chr14_99947654_99947852	2.05886	86.8792	64.7594	0	0
chr15_101142288_101142486	0.255434	8.5131	6.34563	1.10759e-10	8.46744e-18
chr15_101142682_101142880	0.0975595	1.6528	1.23199	0.108976	0.0491855
chr15_23892907_23893105	0.406249	15.0666	11.2306	1.44272e-29	1.34275e-51
chr15_32933771_32933969	0.187632	5.56683	4.14949	1.66607e-05	1.29709e-08
chr15_32933871_32934069	0.0652147	0.247294	0.184332	0.426877	0.40234
chr15_32933971_32934169	0.423735	15.8264	11.797	2.02308e-32	1.02224e-56
chr15_34393974_34394172	0.530342	20.4589	15.25	8.22938e-53	2.50039e-93
chr15_34517165_34517363	0.781254	31.3621	23.3772	3.64848e-121	3.33006e-216
chr15_34635237_34635435	0.184369	5.42504	4.0438	2.62956e-05	2.8971e-08
chr15_35261832_35262030	0.406834	15.092	11.2495	1.16419e-29	9.13902e-52
chr15_36871767_36871965	0.0335573	-1.12835	-0.841064	0.799844	0.870413
chr15_38746240_38746438	0.398157	14.715	10.9685	2.70859e-28	2.58319e-49
chr15_39873187_39873385	0.148148	3.85108	2.87058	0.00204859	5.87988e-05
chr15_40331244_40331442	0.0622222	0.117258	0.0874038	0.465175	0.453328
chr15_40857111_40857309	0.0330339	-1.15109	-0.858019	0.804559	0.875153
chr15_41523379_41523577	0.315299	11.1144	8.28466	5.92223e-17	5.3357e-29
chr15_41576104_41576302	0.384621	14.1268	10.5301	3.14003e-26	1.29865e-45
chr15_42500376_42500574	0.265537	8.95211	6.67287	1.25425e-11	1.74373e-19
chr15_42565573_42565771	0.190474	5.6903	4.24153	1.11003e-05	6.34089e-09
chr15_42565673_42565871	0.0455247	-0.608313	-0.453434	0.674882	0.72851
chr15_42565773_42565971	0.153263	4.07332	3.03624	0.00119775	2.31736e-05
chr15_43398178_43398376	0.0895515	1.30482	0.97261	0.165374	0.0959766
chr15_43785207_43785405	0.0285714	-1.345	-1.00256	0.841963	0.910688
chr15_43809724_43809922	0.0574713	-0.0891858	-0.0664788	0.526502	0.535533
chr15_44084433_44084631	0.383838	14.0928	10.5047	4.10957e-26	2.10382e-45
chr15_44092724_44092922	0.652772	25.779	19.2156	1.3707e-82	7.6217e-147
chr15_44116763_44116961	0.035714	-1.03463	-0.771208	0.779708	0.849579
chr15_45003622_45003820	0.0330578	-1.15005	-0.857243	0.804345	0.874938
chr15_45021172_45021370	0.229219	7.37392	5.49649	1.9371e-08	8.284e-14
chr15_45315289_45315487	0.540942	20.9195	15.5933	4.04025e-55	1.77812e-97
chr15_45879502_45879700	0.207566	6.43304	4.79517	8.12701e-07	6.25366e-11
chr15_47477358_47477556	0.0675357	0.34815	0.25951	0.397621	0.363864
chr15_49170243_49170441	0.42825	16.0226	11.9432	3.52308e-33	4.44144e-58
chr15_49338535_49338733	0.0454543	-0.611376	-0.455718	0.675703	0.729525
chr15_49338635_49338833	0.999996	40.8673	30.4623	4.1141e-204	0
chr15_49338735_49338933	0.0493828	-0.440666	-0.328471	0.628722	0.670273
chr15_49447704_49447902	0.39847	14.7286	10.9786	2.42123e-28	2.11254e-49
chr15_49447893_49448091	0.141588	3.56602	2.6581	0.00392918	0.000181224
chr15_50647224_50647422	0.186338	5.5106	4.10758	1.99912e-05	1.78803e-08
chr15_50716529_50716727	0.298249	10.3736	7.73242	5.27603e-15	1.63531e-25
chr15_51973580_51973778	0.423934	15.8351	11.8034	1.87413e-32	8.91173e-57
chr15_51973680_51973878	0.241666	7.91483	5.89968	1.82103e-09	1.238e-15
chr15_51973880_51974078	0.108157	2.11332	1.57526	0.0575983	0.0172868
chr15_52312057_52312255	0.0322063	-1.18705	-0.884824	0.811874	0.882396
chr15_52861263_52861461	0.185111	5.45728	4.06784	2.37259e-05	2.4174e-08
chr15_55489013_55489211	0.34172	12.2625	9.14045	3.10964e-20	7.19573e-35
chr15_57210744_57210942	0.119048	2.58655	1.928	0.0269274	0.00484715
chr15_59041768_59041966	0.0594054	-0.00514371	-0.0038341	0.50153	0.502052
chr15_59041868_59042066	0.283019	9.71177	7.23912	2.25808e-13	1.34313e-22
chr15_59157832_59158030	0.166057	4.6293	3.45066	0.00027961	1.83455e-06
chr15_59664947_59665145	0.12987	3.05683	2.27855	0.011347	0.00111847
chr15_59949627_59949825	0.0942391	1.50852	1.12444	0.130412	0.065711
chr15_60771194_60771392	0.261737	8.78697	6.54978	2.88116e-11	7.68207e-19
chr15_62359122_62359320	0.245213	8.06892	6.01454	9.01967e-10	3.54602e-16
chr15_62457382_62457580	0.0365294	-0.999195	-0.744796	0.771802	0.84115
chr15_63449564_63449762	0.466764	17.6962	13.1907	4.96329e-40	2.24196e-70
chr15_63796758_63796956	0.210518	6.56131	4.89077	5.02203e-07	2.66689e-11
chr15_64385966_64386164	0.204093	6.28211	4.68266	1.41587e-06	1.67001e-10
chr15_64386166_64386364	0.0183671	-1.78842	-1.33308	0.908748	0.963146
chr15_64388095_64388293	0.23171	7.48217	5.57718	1.22225e-08	3.65531e-14
chr15_64679943_64680141	0.132447	3.1688	2.36201	0.0090881	0.000765355
chr15_65477559_65477757	0.153787	4.0961	3.05322	0.00113201	2.10083e-05
chr15_65903369_65903567	0.275862	9.40076	7.00729	1.21488e-12	2.70845e-21
chr15_66161767_66161965	0.0260865	-1.45298	-1.08305	0.860606	0.926885
chr15_66797067_66797265	0.0794297	0.864994	0.644763	0.25954	0.193521
chr15_69113074_69113272	0.173819	4.96658	3.70207	0.000106925	3.40723e-07
chr15_69745110_69745308	0.237187	7.72017	5.75458	4.34277e-09	5.80877e-15
chr15_71587628_71587826	0.07317	0.592983	0.442008	0.329242	0.276596
chr15_72978457_72978655	0.685077	27.1828	20.2619	1.39367e-91	5.18867e-163
chr15_74753391_74753589	0.415025	15.4479	11.5148	5.55396e-31	3.89504e-54
chr15_74988249_74988447	0.410935	15.2702	11.3824	2.55954e-30	6.03757e-53
chr15_75017754_75017952	0.155341	4.16362	3.10355	0.000956083	1.56621e-05
chr15_75660335_75660533	0.434955	16.314	12.1604	2.52591e-34	3.92437e-60
chr15_75660837_75661035	0.186736	5.52789	4.12047	1.89053e-05	1.62053e-08
chr15_75743928_75744126	0.0599985	0.0206286	0.0153764	0.493866	0.491771
chr15_77713166_77713364	0.729154	29.0981	21.6896	1.28555e-104	1.89644e-186
chr15_78730498_78730696	0.0800066	0.89006	0.663447	0.253522	0.186717
chr15_78832689_78832887	0.740159	29.5763	22.0461	5.20972e-108	1.50705e-192
chr15_79165241_79165439	0.0235842	-1.56172	-1.1641	0.877808	0.940823
chr15_79373687_79373885	0.0641025	0.198966	0.148308	0.44105	0.421145
chr15_80215969_80216167	0.221837	7.05318	5.25741	7.30489e-08	8.74389e-13
chr15_80908634_80908832	0.110455	2.21315	1.64967	0.0495052	0.0134438
chr15_83419242_83419440	0.630436	24.8084	18.4921	1.19526e-76	3.63596e-136
chr15_85197376_85197574	1.68747	70.7407	52.7299	0	0
chr15_85259254_85259452	0.137242	3.37718	2.51734	0.00591231	0.000366167
chr15_85341971_85342169	0.171657	4.87265	3.63205	0.000140589	5.5057e-07
chr15_86123687_86123885	0.0362321	-1.01212	-0.754427	0.774704	0.844259
chr15_86126032_86126230	0.106519	2.04215	1.52221	0.0639784	0.0205685
chr15_89010504_89010702	0.496939	19.0075	14.1681	7.21981e-46	7.39854e-81
chr15_89010852_89011050	0.143146	3.6337	2.70855	0.00337894	0.000139693
chr15_89631610_89631808	0.259005	8.66824	6.46127	5.19124e-11	2.19419e-18
chr15_90349702_90349900	0.089826	1.31675	0.981502	0.163173	0.0939608
chr15_90437119_90437317	0.532552	20.555	15.3216	2.74247e-53	3.47296e-94
chr15_90808834_90809032	0.249108	8.23819	6.14071	4.10755e-10	8.74174e-17
chr15_90895426_90895624	0.418724	15.6087	11.6347	1.37353e-31	3.17664e-55
chr15_93363708_93363906	0.0721648	0.549305	0.40945	0.341105	0.291398
chr15_93447649_93447847	0.161758	4.4425	3.31142	0.000464112	4.44592e-06
chr16_10837603_10837801	1.24045	51.3161	38.2508	0	0
chr16_1128535_1128733	0.461545	17.4694	13.0217	4.60736e-39	1.22424e-68
chr16_12009739_12009937	0.248156	8.19682	6.10988	4.98538e-10	1.23415e-16
chr16_1470632_1470830	0.723164	28.8378	21.4956	8.55997e-103	3.60226e-183
chr16_14726705_14726903	0.0692104	0.420922	0.313754	0.376854	0.336906
chr16_18801560_18801758	0.773585	31.0288	23.1287	1.18969e-118	1.10218e-211
chr16_18812757_18812955	0.405756	15.0452	11.2146	1.72875e-29	1.85733e-51
chr16_19535152_19535350	0.416657	15.5189	11.5677	3.00339e-31	1.29281e-54
chr16_19566932_19567130	0.458334	17.3299	12.9176	1.7898e-38	1.3991e-67
chr16_20753021_20753219	0.0636344	0.178624	0.133146	0.447039	0.429116
chr16_2083188_2083386	0.131255	3.11699	2.32339	0.0100791	0.000913545
chr16_21964570_21964768	0.360898	13.0959	9.76164	8.22394e-23	1.73752e-39
chr16_2205231_2205429	0.305735	10.6989	7.9749	7.62522e-16	5.15104e-27
chr16_23568568_23568766	0.248107	8.19471	6.1083	5.03486e-10	1.25604e-16
chr16_23652700_23652898	0.246574	8.12806	6.05862	6.86453e-10	2.18107e-16
chr16_25122978_25123176	0.0428565	-0.724261	-0.539861	0.705354	0.765547
chr16_27279980_27280178	0.395888	14.6163	10.895	6.09045e-28	1.10469e-48
chr16_27561370_27561568	0.462121	17.4944	13.0403	3.60941e-39	7.89853e-69
chr16_28503286_28503484	0.144917	3.71069	2.76594	0.00283798	0.000103346
chr16_28550199_28550397	0.173319	4.94487	3.68589	0.000113952	3.80964e-07
chr16_28857538_28857736	0.340425	12.2063	9.09852	4.57855e-20	1.43857e-34
chr16_2908050_2908248	0.0243891	-1.52674	-1.13803	0.872445	0.936587
chr16_29690377_29690575	0.121217	2.6808	1.99826	0.0228443	0.0036723
chr16_29819309_29819507	0.0655734	0.262882	0.195951	0.422324	0.396321
chr16_29831679_29831877	0.196088	5.93425	4.42337	4.85874e-06	1.47596e-09
chr16_29911771_29911969	0.043103	-0.713549	-0.531876	0.702594	0.762247
chr16_29911871_29912069	0.0277778	-1.37949	-1.02827	0.848088	0.916128
chr16_29985111_29985309	2.1848	92.3519	68.8387	0	0
chr16_30075440_30075638	0.0925211	1.43387	1.0688	0.14258	0.0758051
chr16_30075540_30075738	0.156863	4.22976	3.15285	0.000808434	1.1697e-05
chr16_30075640_30075838	0.159875	4.36067	3.25042	0.000576167	6.48336e-06
chr16_30075649_30075847	0.0427041	-0.730882	-0.544797	0.707053	0.767574
chr16_30441231_30441429	0.333334	11.8982	8.86884	3.69559e-19	6.04945e-33
chr16_30662161_30662359	0.0740716	0.632161	0.47121	0.318745	0.263641
chr16_30662261_30662459	0.0819669	0.975242	0.726942	0.233631	0.16472
chr16_3073858_3074056	0.150943	3.97254	2.96111	0.00153264	3.55553e-05
chr16_3074173_3074371	0.141026	3.5416	2.63989	0.0041466	0.000198855
chr16_30773556_30773754	0.927554	37.7194	28.1159	3.13441e-174	0
chr16_31085650_31085848	0.158732	4.31097	3.21338	0.000655907	8.12688e-06
chr16_31106190_31106388	0.358683	12.9997	9.68991	1.66415e-22	6.14312e-39
chr16_31106290_31106488	0.21592	6.79603	5.06573	2.03416e-07	5.37713e-12
chr16_31146902_31147100	0.0533336	-0.268989	-0.200503	0.579456	0.606031
chr16_3115275_3115473	0.28188	9.66226	7.20221	2.9622e-13	2.18067e-22
chr16_3115570_3115768	0.188153	5.58947	4.16637	1.54747e-05	1.13885e-08
chr16_31885049_31885247	0.199115	6.06581	4.52143	3.07113e-06	6.56444e-10
chr16_48278152_48278350	0.493747	18.8687	14.0647	3.13093e-45	1.03129e-79
chr16_4845303_4845501	0.65193	25.7424	19.1883	2.31739e-82	1.95894e-146
chr16_53737981_53738179	0.0392157	-0.882467	-0.657787	0.744663	0.811238
chr16_55685294_55685492	0.131632	3.13341	2.33563	0.00975528	0.000863948
chr16_56333188_56333386	0.0224384	-1.61151	-1.20121	0.885165	0.946465
chr16_56485133_56485331	0.767085	30.7464	22.9182	1.52896e-116	6.83628e-208
chr16_56642429_56642627	0.365419	13.2924	9.90809	1.91964e-23	1.2815e-40
chr16_56651307_56651505	0.297615	10.346	7.71187	6.19914e-15	2.18148e-25
chr16_56659624_56659822	0.15859	4.30484	3.20881	0.000666418	8.35516e-06
chr16_56672496_56672694	0.256191	8.54597	6.37013	9.4432e-11	6.373e-18
chr16_56691792_56691990	0.0612245	0.0739022	0.0550864	0.478035	0.470544
chr16_56716301_56716499	0.283765	9.74416	7.26326	1.88938e-13	9.76952e-23
chr16_57653537_57653735	0.184624	5.4361	4.05205	2.53859e-05	2.72302e-08
chr16_57653873_57654071	0.585011	22.8345	17.0208	2.88076e-65	1.04131e-115
chr16_57662534_57662732	0.0435863	-0.692548	-0.516222	0.69715	0.755703
chr16_58163136_58163334	0.272023	9.23395	6.88295	2.93135e-12	1.30421e-20
chr16_58533957_58534155	0.227035	7.27904	5.42577	2.88532e-08	1.68105e-13
chr16_58663632_58663830	0.0778485	0.796282	0.593546	0.276408	0.212934
chr16_66968426_66968624	0.307703	10.7844	8.03864	4.54211e-16	2.03981e-27
chr16_67232953_67233151	0.0591742	-0.015192	-0.0113241	0.504518	0.50606
chr16_67260960_67261158	1.31881	54.721	40.7888	0	0
chr16_67840356_67840554	0.516129	19.8413	14.7896	8.54308e-50	6.54883e-88
chr16_67969476_67969674	0.240124	7.84781	5.84972	2.46196e-09	2.1169e-15
chr16_68344724_68344922	0.0810074	0.933549	0.695864	0.243257	0.175268
chr16_69385572_69385770	0.124975	2.84412	2.12	0.0170031	0.00222668
chr16_69788722_69788920	0.255312	8.50776	6.34165	1.13656e-10	8.86602e-18
chr16_70323303_70323501	0.118756	2.57387	1.91855	0.0275207	0.00502846
chr16_70333018_70333216	0.114703	2.39778	1.78729	0.036945	0.00824744
chr16_70380713_70380911	0.315068	11.1044	8.2772	6.30548e-17	5.96906e-29
chr16_70557343_70557541	0.140945	3.53809	2.63728	0.00417874	0.000201519
chr16_70557643_70557841	0.500079	19.1439	14.2698	1.68812e-46	5.44121e-82
chr16_71264508_71264706	0.0521327	-0.321173	-0.239401	0.594603	0.62596
chr16_71598692_71598890	0.234292	7.59436	5.66081	7.53319e-09	1.54659e-14
chr16_71842615_71842813	0.1941	5.84789	4.35899	6.53308e-06	2.48924e-09
chr16_71842851_71843049	0.409095	15.1903	11.3228	5.06084e-30	2.05084e-52
chr16_72127412_72127610	0.1448	3.70558	2.76212	0.00287133	0.000105454
chr16_72127630_72127828	0.0266665	-1.42778	-1.06426	0.856395	0.923322
chr16_74330636_74330834	0.767675	30.772	22.9373	9.85567e-117	3.10361e-208
chr16_74700674_74700872	0.143679	3.6569	2.72584	0.0032069	0.000127641
chr16_75239951_75240149	0.0771511	0.76598	0.570958	0.284014	0.221844
chr16_75241014_75241212	0.106695	2.04976	1.52788	0.0632709	0.020194
chr16_75241114_75241312	0.0672266	0.33472	0.249499	0.401487	0.368918
chr16_75241214_75241412	0.0265487	-1.4329	-1.06808	0.857257	0.924057
chr16_75252714_75252912	0.0317441	-1.20714	-0.899797	0.815886	0.886311
chr16_75252814_75253012	0.41216	15.3234	11.422	1.62285e-30	2.6662e-53
chr16_75252914_75253112	0.025316	-1.48646	-1.108	0.86607	0.931422
chr16_75590037_75590235	0.127389	2.94901	2.19818	0.013968	0.00159395
chr16_75657037_75657235	0.046875	-0.549638	-0.409698	0.658986	0.708716
chr16_75681453_75681651	0.787041	31.6135	23.5646	4.44714e-123	1.20316e-219
chr16_77224751_77224949	0.107759	2.096	1.56235	0.0591028	0.0180411
chr16_77225011_77225209	0.120009	2.62833	1.95914	0.025048	0.00429031
chr16_81679163_81679361	0.155504	4.17074	3.10885	0.000939085	1.51809e-05
chr16_82044973_82045171	0.383037	14.0579	10.4787	5.40918e-26	3.44312e-45
chr16_83841511_83841709	1.13051	46.5388	34.6899	5.60332e-264	0
chr16_83986740_83986938	0.256289	8.55023	6.3733	9.24989e-11	6.1424e-18
chr16_84220524_84220722	0.392778	14.4812	10.7942	1.83246e-27	7.96341e-48
chr16_85646784_85646982	0.0326798	-1.16648	-0.869486	0.807709	0.878289
chr16_86104145_86104343	0.468087	17.7537	13.2335	2.80913e-40	8.0691e-71
chr16_87799451_87799649	0.72381	28.8659	21.5165	5.4531e-103	1.60124e-183
chr16_8814491_8814689	0.0416026	-0.778746	-0.580474	0.719203	0.781935
chr16_88636735_88636933	0.424674	15.8673	11.8274	1.40888e-32	5.34084e-57
chr16_8891613_8891811	0.812844	32.7348	24.4004	8.47516e-132	2.50135e-235
chr17_10600743_10600941	0.378427	13.8576	10.3294	2.59408e-25	5.72143e-44
chr17_1303380_1303578	0.129867	3.05668	2.27844	0.0113503	0.00111902
chr17_13972742_13972940	1.1537	47.5464	35.4409	2.00376e-275	0
chr17_15466746_15466944	1.01786	41.6434	31.0408	7.58553e-212	0
chr17_15602969_15603167	1.7451	73.2449	54.5965	0	0
chr17_16120434_16120632	0.854615	34.5499	25.7533	1.47858e-146	7.15711e-262
chr17_16284307_16284505	0.247181	8.15446	6.07831	6.07295e-10	1.75366e-16
chr17_16342216_16342414	0.0287749	-1.33616	-0.995969	0.840367	0.909252
chr17_16342561_16342759	0.0317477	-1.20698	-0.899679	0.815854	0.88628
chr17_17421340_17421538	0.0529101	-0.287392	-0.214221	0.584813	0.613094
chr17_17494867_17495065	0.9546	38.8946	28.9919	4.16103e-185	0
chr17_17875615_17875813	0.190164	5.67686	4.23151	1.16064e-05	6.85947e-09
chr17_18163836_18164034	0.200004	6.10442	4.55021	2.67965e-06	5.15886e-10
chr17_18218180_18218378	0.0812821	0.945484	0.70476	0.24048	0.172206
chr17_18528818_18529016	0.274521	9.3425	6.96386	1.65535e-12	4.70439e-21
chr17_18684444_18684642	0.553844	21.4802	16.0113	5.33136e-58	1.19225e-102
chr17_18761363_18761561	0.285497	9.81943	7.31936	1.24576e-13	4.64347e-23
chr17_19091275_19091473	0.0277783	-1.37947	-1.02825	0.848084	0.916125
chr17_19265809_19266007	0.222222	7.0699	5.26987	6.8259e-08	7.75246e-13
chr17_19281733_19281931	0.222245	7.07089	5.27062	6.7983e-08	7.69692e-13
chr17_1933360_1933558	0.185653	5.48081	4.08537	2.20032e-05	2.11697e-08
chr17_202473_202671	0.042548	-0.737663	-0.549851	0.708789	0.769641
chr17_208694_208892	0.126943	2.92962	2.18373	0.0144912	0.00169689
chr17_208794_208992	0.127909	2.97162	2.21504	0.0133788	0.00148114
chr17_208894_209092	0.168949	4.75497	3.54433	0.000196803	9.9239e-07
chr17_25621037_25621235	0.0303029	-1.26976	-0.946477	0.828047	0.897916
chr17_26560934_26561132	0.0493944	-0.44016	-0.328093	0.628579	0.670089
chr17_26646100_26646298	0.333333	11.8981	8.86881	3.69671e-19	6.05272e-33
chr17_26646200_26646398	0.029412	-1.30848	-0.975335	0.835303	0.904644
chr17_26646300_26646498	0.148114	3.84959	2.86947	0.00205582	5.91587e-05
chr17_26662359_26662557	0.746196	29.8386	22.2416	6.80046e-110	6.16371e-196
chr17_26988833_26989031	0.155037	4.15043	3.09372	0.000988333	1.65924e-05
chr17_26989128_26989326	0.900419	36.5403	27.237	1.18554e-163	1.27275e-292
chr17_27046927_27047125	1.17452	48.4508	36.1151	6.57938e-286	0
chr17_27621025_27621223	0.0462968	-0.574764	-0.428426	0.66583	0.717274
chr17_28443756_28443954	0.858055	34.6994	25.8648	8.29563e-148	4.02423e-264
chr17_28804349_28804547	0.726938	29.0018	21.6178	6.10239e-104	3.12035e-185
chr17_30228629_30228827	0.27588	9.40155	7.00788	1.20981e-12	2.68831e-21
chr17_30677094_30677292	0.56064	21.7755	16.2314	1.51293e-59	1.98026e-105
chr17_30771425_30771623	0.588948	23.0056	17.1483	3.23654e-66	2.04815e-117
chr17_33569994_33570192	0.034783	-1.07509	-0.801365	0.78854	0.858832
chr17_33914270_33914468	0.208125	6.45733	4.81327	7.42402e-07	5.32825e-11
chr17_34842439_34842637	0.129496	3.04057	2.26643	0.0117125	0.00118065
chr17_3539939_3540137	0.104048	1.93475	1.44216	0.0746292	0.0265104
chr17_3571789_3571987	0.15433	4.11972	3.07083	0.00106734	1.89664e-05
chr17_36003373_36003571	0.21797	6.88514	5.13216	1.43221e-07	2.88656e-12
chr17_36104955_36105153	0.410103	15.2341	11.3554	3.48566e-30	1.05064e-52
chr17_36908919_36909117	0.254726	8.48232	6.32269	1.28528e-10	1.10376e-17
chr17_36981460_36981658	0.214286	6.72504	5.01282	2.68192e-07	8.77719e-12
chr17_37009888_37010086	0.221154	7.02347	5.23527	8.23727e-08	1.08211e-12
chr17_37607407_37607605	0.602872	23.6106	17.5993	1.24727e-69	1.49807e-123
chr17_37617655_37617853	0.0426829	-0.731802	-0.545482	0.707289	0.767855
chr17_37844193_37844391	0.391305	14.4172	10.7465	3.07621e-27	2.01614e-47
chr17_38083920_38084118	0.134752	3.26897	2.43668	0.00741145	0.000539699
chr17_38171602_38171800	0.107554	2.08709	1.55571	0.0598884	0.0184399
chr17_38210554_38210752	0.574076	22.3593	16.6666	1.14705e-62	4.8976e-111
chr17_38255640_38255838	0.0990602	1.71802	1.2806	0.100167	0.0428968
chr17_38256731_38256929	0.133971	3.23504	2.41139	0.00794597	0.000608124
chr17_38256931_38257129	0.0326791	-1.16651	-0.869509	0.807716	0.878295
chr17_38257031_38257229	0.0877193	1.22521	0.913266	0.180551	0.110248
chr17_38803976_38804174	0.416668	15.5193	11.5681	2.99107e-31	1.28331e-54
chr17_39092808_39093006	0.193289	5.81264	4.33272	7.36407e-06	3.07485e-09
chr17_40169356_40169554	0.368091	13.4085	9.99463	8.04411e-24	2.69643e-41
chr17_40346388_40346586	0.38595	14.1845	10.5731	1.98587e-26	5.71139e-46
chr17_4046906_4047104	0.159093	4.32666	3.22508	0.000629693	7.56928e-06
chr17_4047256_4047454	0.0217391	-1.64189	-1.22386	0.889498	0.949694
chr17_40540360_40540558	0.288886	9.96672	7.42915	5.46475e-14	1.06577e-23
chr17_40575131_40575329	0.162796	4.4876	3.34504	0.000411359	3.60158e-06
chr17_40714099_40714297	0.457145	17.2782	12.8791	2.95049e-38	3.43203e-67
chr17_40925396_40925594	0.51642	19.854	14.7991	7.42603e-50	5.09155e-88
chr17_40950605_40950803	0.136855	3.36034	2.50478	0.00612636	0.000389239
chr17_40976167_40976365	0.963628	39.2869	29.2843	8.21373e-189	0
chr17_40985507_40985705	0.0566058	-0.126798	-0.0945151	0.53765	0.55045
chr17_40985607_40985805	0.103259	1.90046	1.41659	0.0783012	0.0286867
chr17_41116370_41116568	0.271375	9.20577	6.86195	3.39641e-12	1.6961e-20
chr17_41150363_41150561	2.17636	91.985	68.5653	0	0
chr17_41150657_41150855	0.0860207	1.1514	0.858249	0.195378	0.124784
chr17_41322191_41322389	0.145259	3.72555	2.77701	0.00274306	9.74445e-05
chr17_41438594_41438792	0.263927	8.88213	6.6207	1.78747e-11	3.27967e-19
chr17_41561289_41561487	0.0390433	-0.889956	-0.66337	0.746453	0.813255
chr17_4167162_4167360	0.347816	12.5274	9.33791	4.91295e-21	2.64203e-36
chr17_42092231_42092429	0.49627	18.9784	14.1464	9.82891e-46	1.28754e-80
chr17_42247966_42248164	0.130215	3.07183	2.28973	0.0110186	0.00106377
chr17_42264250_42264448	0.608706	23.8642	17.7883	4.35743e-71	3.60889e-126
chr17_42422555_42422753	0.433325	16.2432	12.1076	4.81451e-34	1.24875e-59
chr17_42976698_42976896	0.108008	2.10683	1.57043	0.0581581	0.017566
chr17_43138592_43138790	1.32611	55.0383	41.0253	0	0
chr17_44302634_44302832	0.0389593	-0.89361	-0.666093	0.747324	0.814235
chr17_45908772_45908970	0.502375	19.2436	14.3441	5.79686e-47	7.97965e-83
chr17_46035106_46035304	0.216426	6.81801	5.08212	1.86626e-07	4.61557e-12
chr17_46126052_46126250	0.0166665	-1.86232	-1.38817	0.917457	0.968721
chr17_46970071_46970269	0.0747648	0.662284	0.493664	0.310772	0.253895
chr17_4699396_4699594	0.700426	27.8498	20.7591	5.07122e-96	5.41988e-171
chr17_47492135_47492333	0.185231	5.46249	4.07172	2.33337e-05	2.3475e-08
chr17_47755303_47755501	0.211439	6.60133	4.92061	4.3138e-07	2.03739e-11
chr17_47865953_47866151	1.16593	48.0777	35.8369	1.47027e-281	0
chr17_4843301_4843499	0.0560899	-0.149217	-0.111226	0.544281	0.559309
chr17_4843827_4844025	0.153846	4.0987	3.05515	0.00112473	2.07743e-05
chr17_48450435_48450633	0.274286	9.33226	6.95623	1.74747e-12	5.1817e-21
chr17_4871003_4871201	0.0329691	-1.15391	-0.860118	0.805138	0.875731
chr17_53045909_53046107	0.363449	13.2068	9.84428	3.62771e-23	4.00896e-40
chr17_53046028_53046226	0.399987	14.7945	11.0277	1.40421e-28	7.952e-50
chr17_5322865_5323063	0.15586	4.1862	3.12037	0.000903106	1.41834e-05
chr17_5323403_5323601	0.0393694	-0.875788	-0.652809	0.74306	0.809427
chr17_5389393_5389591	0.150793	3.96601	2.95625	0.00155704	3.65434e-05
chr17_5390098_5390296	1.36364	56.6689	42.2408	0	0
chr17_55038289_55038487	0.267967	9.0577	6.75158	7.31243e-12	6.66142e-20
chr17_56084584_56084782	0.344758	12.3946	9.23886	1.24566e-20	1.39825e-35
chr17_56084684_56084882	0.526329	20.2846	15.12	5.97396e-52	8.80071e-92
chr17_56429446_56429644	0.488938	18.6597	13.9089	2.79664e-44	5.26165e-78
chr17_56709086_56709284	0.0924374	1.43023	1.06609	0.143192	0.0763259
chr17_57642903_57643101	0.0911651	1.37494	1.02488	0.152711	0.0845748
chr17_57784691_57784889	0.042093	-0.757438	-0.564591	0.713824	0.775606
chr17_57784929_57785127	0.514953	19.7902	14.7515	1.50369e-49	1.80805e-87
chr17_57915210_57915408	0.0618551	0.101304	0.0755119	0.469904	0.459654
chr17_57915510_57915708	0.145833	3.75049	2.7956	0.00259015	8.82435e-05
chr17_58755115_58755313	0.875	35.4357	26.4136	4.77815e-154	2.40929e-275
chr17_60143187_60143385	0.19084	5.7062	4.25338	1.05284e-05	5.77632e-09
chr17_60501191_60501389	0.689408	27.371	20.4022	7.99089e-93	3.0399e-165
chr17_61627788_61627986	0.144304	3.68403	2.74606	0.00301575	0.000114786
chr17_61627888_61628086	0.257143	8.58734	6.40097	7.71963e-11	4.45025e-18
chr17_61627988_61628186	0.047619	-0.517311	-0.385602	0.650104	0.697531
chr17_62223251_62223449	0.0312495	-1.22863	-0.915817	0.820119	0.890395
chr17_62502275_62502473	0.157316	4.24948	3.16755	0.000768654	1.07133e-05
chr17_62503035_62503233	0.160378	4.38252	3.26671	0.000544025	5.86582e-06
chr17_62971443_62971641	0.0775871	0.784924	0.585079	0.279247	0.216249
chr17_64225417_64225615	0.126248	2.89944	2.16123	0.0153388	0.00186915
chr17_65241199_65241397	0.431336	16.1567	12.0431	1.05378e-33	5.09274e-59
chr17_6554786_6554984	0.0945945	1.52396	1.13596	0.127987	0.0637589
chr17_66031773_66031971	0.0428574	-0.724222	-0.539832	0.705344	0.765535
chr17_66508068_66508266	0.0606147	0.047406	0.0353362	0.485906	0.481095
chr17_70117075_70117273	0.0899137	1.32056	0.984343	0.162473	0.0933235
chr17_71088734_71088932	0.0842698	1.07531	0.801534	0.211411	0.141117
chr17_7155191_7155389	0.204917	6.3179	4.70934	1.24262e-06	1.32572e-10
chr17_72199731_72199929	1.21153	50.0591	37.3139	4.88628e-305	0
chr17_73042954_73043152	0.347429	12.5106	9.32537	5.52986e-21	3.26547e-36
chr17_7307312_7307510	0.175	5.0179	3.74033	9.18911e-05	2.61192e-07
chr17_73201707_73201905	0.091463	1.38789	1.03453	0.150445	0.0825856
chr17_73257592_73257790	0.236474	7.68919	5.73149	4.9775e-09	7.40335e-15
chr17_73257882_73258080	0.457797	17.3065	12.9002	2.24385e-38	2.09948e-67
chr17_73642631_73642829	0.147856	3.8384	2.86113	0.00211069	6.19197e-05
chr17_73663297_73663495	0.683772	27.1261	20.2197	3.28672e-91	2.42633e-162
chr17_73775724_73775922	0.0564967	-0.131537	-0.0980473	0.539053	0.552325
chr17_73851311_73851509	0.293748	10.178	7.58664	1.64156e-14	1.24315e-24
chr17_7387616_7387814	0.242995	7.97256	5.94271	1.40171e-09	7.77114e-16
chr17_74099719_74099917	0.314291	11.0707	8.25203	7.78622e-17	8.70504e-29
chr17_7416395_7416593	0.0367816	-0.988237	-0.736628	0.769326	0.838482
chr17_7416495_7416693	0.05455	-0.216132	-0.161104	0.563994	0.585558
chr17_7416595_7416793	0.514621	19.7758	14.7408	1.76301e-49	2.40614e-87
chr17_74553773_74553971	2.03848	85.9934	64.0991	0	0
chr17_74722647_74722845	0.144511	3.69302	2.75276	0.00295473	0.000110803
chr17_74733315_74733513	0.026087	-1.45296	-1.08303	0.860603	0.926883
chr17_7476036_7476234	0.146437	3.77672	2.81515	0.00243769	7.94527e-05
chr17_7482869_7483067	0.704762	28.0382	20.8996	2.70228e-97	2.78275e-173
chr17_7487065_7487263	0.46024	17.4127	12.9794	8.0108e-39	3.30455e-68
chr17_75084700_75084898	0.279727	9.56869	7.13247	4.92933e-13	5.41332e-22
chr17_7531048_7531246	0.0289841	-1.32707	-0.989193	0.838716	0.907757
chr17_76975904_76976102	0.075626	0.699706	0.521558	0.300989	0.242055
chr17_7738709_7738907	0.0698882	0.450376	0.335708	0.368545	0.32622
chr17_78237364_78237562	0.100705	1.78947	1.33386	0.0911241	0.0367695
chr17_7835168_7835366	0.0895532	1.3049	0.972667	0.165359	0.0959635
chr17_78518563_78518761	0.418902	15.6164	11.6404	1.28372e-31	2.81372e-55
chr17_79479241_79479439	0.0444448	-0.655241	-0.488414	0.687372	0.743844
chr17_80064141_80064339	0.0333332	-1.13808	-0.848324	0.801871	0.872457
chr17_8059560_8059758	0.0638298	0.187115	0.139475	0.444538	0.425785
chr17_900275_900473	0.0777796	0.793287	0.591313	0.277155	0.213805
chr17_9144087_9144285	0.348503	12.5573	9.36018	3.98009e-21	1.81195e-36
chr17_9479051_9479249	0.376068	13.7551	10.253	5.73554e-25	2.37244e-43
chr18_10525965_10526163	0.0405428	-0.824801	-0.614803	0.730658	0.795258
chr18_11851330_11851528	1.08539	44.5781	33.2283	2.09818e-242	0
chr18_13726583_13726781	0.883533	35.8065	26.69	3.07206e-157	4.37335e-281
chr18_20734896_20735094	0.176724	5.09284	3.79618	7.34712e-05	1.76372e-07
chr18_21033164_21033362	0.316547	11.1687	8.32509	4.21326e-17	2.90189e-29
chr18_267928_268126	0.282608	9.6939	7.22579	2.49091e-13	1.60036e-22
chr18_28682239_28682437	0.0377358	-0.946773	-0.705721	0.759819	0.828123
chr18_29171740_29171938	0.0390027	-0.891724	-0.664688	0.746875	0.81373
chr18_32073229_32073427	0.136332	3.33763	2.48786	0.0064258	0.000422483
chr18_32556899_32557097	0.249027	8.23466	6.13809	4.17607e-10	9.00308e-17
chr18_32558911_32559109	0.0510206	-0.369499	-0.275423	0.608504	0.644122
chr18_32820939_32821137	0.152925	4.05867	3.02532	0.00124185	2.46761e-05
chr18_32870210_32870408	1.17187	48.3361	36.0295	1.44252e-284	0
chr18_33552567_33552765	0.28347	9.73135	7.25371	2.02759e-13	1.10821e-22
chr18_33709778_33709976	0.325056	11.5384	8.6007	3.9616e-18	4.22273e-31
chr18_39535098_39535296	0.175003	5.01805	3.74043	9.18516e-05	2.60995e-07
chr18_40857335_40857533	0.30481	10.6587	7.94493	9.71468e-16	7.94223e-27
chr18_40857435_40857633	0.220589	6.99892	5.21697	9.09393e-08	1.28975e-12
chr18_43547160_43547358	0.215824	6.79187	5.06264	2.0675e-07	5.53435e-12
chr18_43678145_43678343	0.419035	15.6222	11.6447	1.22032e-31	2.5693e-55
chr18_44702593_44702791	0.316266	11.1565	8.31599	4.54957e-17	3.32923e-29
chr18_47018091_47018289	0.100766	1.79214	1.33585	0.0907984	0.0365552
chr18_47018744_47018942	0.306449	10.7299	7.99801	6.32249e-16	3.68481e-27
chr18_47088349_47088547	0.066007	0.281723	0.209996	0.416836	0.389078
chr18_47340510_47340708	0.050633	-0.386341	-0.287977	0.613318	0.650378
chr18_47807758_47807956	0.190567	5.69435	4.24455	1.09518e-05	6.19213e-09
chr18_47813949_47814147	0.232759	7.52775	5.61115	1.00492e-08	2.5812e-14
chr18_48556502_48556700	0.202383	6.2078	4.62727	1.85256e-06	2.68649e-10
chr18_54318538_54318736	0.163934	4.53706	3.38191	0.000359921	2.85217e-06
chr18_55288926_55289124	0.288449	9.94772	7.41499	6.0818e-14	1.2902e-23
chr18_55888683_55888881	0.499992	19.1401	14.267	1.7579e-46	5.85179e-82
chr18_55888783_55888981	0.0769224	0.75604	0.563549	0.28653	0.224813
chr18_55888883_55889081	0.161451	4.42913	3.30146	0.000480921	4.73068e-06
chr18_57026372_57026570	0.108527	2.12939	1.58724	0.0562292	0.016611
chr18_57567146_57567344	0.159334	4.33715	3.23289	0.000612721	7.21726e-06
chr18_59854154_59854352	0.155876	4.1869	3.1209	0.000901497	1.41394e-05
chr18_59854435_59854633	0.910177	36.9643	27.553	2.03582e-167	2.14856e-299
chr18_61089590_61089788	0.348669	12.5645	9.36554	3.783e-21	1.6544e-36
chr18_66382199_66382397	0.206896	6.40393	4.77346	9.05434e-07	7.57161e-11
chr18_71815663_71815861	0.593263	23.1931	17.288	2.89438e-67	2.67306e-119
chr18_72922710_72922908	0.451328	17.0254	12.6907	3.32939e-37	2.65931e-65
chr18_73706213_73706411	0.196374	5.9467	4.43265	4.6542e-06	1.36803e-09
chr18_77905846_77906044	0.0728758	0.580198	0.432478	0.332697	0.28089
chr19_1021426_1021624	0.193953	5.84147	4.35421	6.67741e-06	2.5871e-09
chr19_10230464_10230662	0.0296346	-1.2988	-0.968122	0.833508	0.902994
chr19_10381683_10381881	0.141408	3.55822	2.65228	0.00399752	0.000186692
chr19_10491104_10491302	0.214289	6.72518	5.01292	2.68045e-07	8.76865e-12
chr19_10697860_10698058	0.382346	14.0279	10.4564	6.85103e-26	5.25938e-45
chr19_10764407_10764605	0.316667	11.1739	8.32898	4.0771e-17	2.73626e-29
chr19_10812039_10812237	0.448686	16.9107	12.6051	9.89081e-37	1.8773e-64
chr19_11039188_11039386	0.549457	21.2896	15.8692	5.18128e-57	7.09245e-101
chr19_11200049_11200247	0.135613	3.30639	2.46457	0.00685887	0.000472531
chr19_11202501_11202699	0.13659	3.34885	2.49622	0.0062763	0.000405745
chr19_11456829_11457027	0.0339839	-1.10981	-0.827247	0.795951	0.866459
chr19_11457105_11457303	0.270237	9.15633	6.8251	4.39336e-12	2.68453e-20
chr19_11491785_11491983	0.0752692	0.6842	0.51	0.305026	0.246924
chr19_11546163_11546361	0.0698317	0.44792	0.333878	0.369236	0.327106
chr19_11546369_11546567	0.407882	15.1376	11.2835	7.91709e-30	4.57649e-52
chr19_11669947_11670145	0.275734	9.39521	7.00315	1.25134e-12	2.85521e-21
chr19_12098382_12098580	0.0352949	-1.05284	-0.784784	0.78371	0.853793
chr19_12175462_12175660	0.0435282	-0.695071	-0.518103	0.697807	0.756494
chr19_12662184_12662382	0.0731708	0.593017	0.442032	0.329233	0.276585
chr19_12721484_12721682	0.0858429	1.14367	0.852487	0.196972	0.12638
chr19_12721665_12721863	0.252566	8.38845	6.25272	2.01689e-10	2.46304e-17
chr19_12779942_12780140	0.238146	7.76187	5.78567	3.61128e-09	4.18437e-15
chr19_12780136_12780334	0.409101	15.1905	11.323	5.05003e-30	2.04299e-52
chr19_12792570_12792768	0.204508	6.30013	4.69609	1.32593e-06	1.48697e-10
chr19_12848216_12848414	0.0523571	-0.311421	-0.232132	0.591782	0.62226
chr19_12902222_12902420	0.220312	6.98688	5.20799	9.54471e-08	1.40533e-12
chr19_13001890_13002088	0.207778	6.44222	4.80201	7.85409e-07	5.88675e-11
chr19_13044421_13044619	0.289086	9.9754	7.43562	5.20381e-14	9.76578e-24
chr19_13263817_13264015	0.126582	2.91396	2.17205	0.0149259	0.0017844
chr19_13710856_13711054	0.159604	4.3489	3.24166	0.000594188	6.841e-06
chr19_13885190_13885388	0.669106	26.4888	19.7446	4.46098e-87	6.52764e-155
chr19_14247880_14248078	0.183907	5.40494	4.02882	2.80286e-05	3.2415e-08
chr19_1438289_1438487	3.81462	163.174	121.629	0	0
chr19_14530057_14530255	0.142222	3.59357	2.67863	0.00369615	0.000163087
chr19_14628867_14629065	0.489718	18.6937	13.9342	1.96348e-44	2.7879e-78
chr19_15490488_15490686	0.192702	5.78714	4.31371	8.02673e-06	3.57968e-09
chr19_15529697_15529895	0.0429156	-0.721691	-0.537946	0.704693	0.764758
chr19_16045582_16045780	0.154321	4.1193	3.07051	0.00106846	1.90009e-05
chr19_16222622_16222820	0.0885711	1.26222	0.940857	0.173389	0.103434
chr19_16296123_16296321	0.514023	19.7498	14.7214	2.34866e-49	4.02778e-87
chr19_16770841_16771039	0.212119	6.63089	4.94264	3.85358e-07	1.66833e-11
chr19_17354706_17354904	0.0408163	-0.812914	-0.605943	0.727724	0.791866
chr19_17416564_17416762	0.932114	37.9175	28.2636	4.84542e-176	0
chr19_17420262_17420460	1.34091	55.6814	41.5047	0	0
chr19_17488023_17488221	0.134316	3.25003	2.42256	0.00770586	0.000576973
chr19_17970627_17970825	1.26029	52.178	38.8933	0	0
chr19_18284515_18284713	0.375	13.7087	10.2184	8.20027e-25	4.50277e-43
chr19_19030077_19030275	0.200501	6.12602	4.56631	2.48193e-06	4.50529e-10
chr19_19249177_19249375	0.154511	4.12759	3.07669	0.00104656	1.83291e-05
chr19_19302861_19303059	0.0892867	1.29332	0.964033	0.167515	0.0979507
chr19_19303641_19303839	0.216793	6.834	5.09403	1.75261e-07	4.12903e-12
chr19_19431196_19431394	0.0706023	0.481405	0.358837	0.359858	0.315114
chr19_19626952_19627150	0.41672	15.5216	11.5697	2.93285e-31	1.23885e-54
chr19_19843794_19843992	0.288073	9.93137	7.40281	6.66679e-14	1.5202e-23
chr19_19932438_19932636	0.181618	5.3055	3.9547	3.83152e-05	5.61814e-08
chr19_19976595_19976793	0.133431	3.21155	2.39387	0.00833576	0.000660116
chr19_20011677_20011875	0.113413	2.3417	1.74549	0.0404498	0.00959819
chr19_20748495_20748693	0.129493	3.04046	2.26635	0.0117151	0.00118108
chr19_20844275_20844473	0.14166	3.56914	2.66042	0.00390216	0.00017908
chr19_20959015_20959213	0.0579716	-0.0674469	-0.0502747	0.520048	0.526887
chr19_21105982_21106180	0.274457	9.33973	6.9618	1.67982e-12	4.82917e-21
chr19_21203361_21203559	0.290915	10.0549	7.49487	3.31824e-14	4.37135e-24
chr19_21324740_21324938	0.235143	7.63134	5.68837	6.41293e-09	1.16166e-14
chr19_21512051_21512249	0.100343	1.77378	1.32217	0.0930566	0.0380502
chr19_21579829_21580027	0.317463	11.2085	8.35475	3.27854e-17	1.85267e-29
chr19_21688318_21688516	0.269691	9.1326	6.8074	4.96878e-12	3.34369e-20
chr19_21751934_21752132	0.176101	5.06576	3.77599	7.96854e-05	2.03392e-07
chr19_21950284_21950482	0.134896	3.27521	2.44133	0.00731666	0.000527917
chr19_22018884_22019082	0.267726	9.04723	6.74377	7.71645e-12	7.33205e-20
chr19_22715165_22715363	0.0405406	-0.824896	-0.614874	0.730681	0.795285
chr19_23456925_23457123	0.101828	1.83827	1.37024	0.0853065	0.0330116
chr19_23578173_23578371	0.189019	5.62709	4.19441	1.36789e-05	9.16356e-09
chr19_23869872_23870070	0.152792	4.05286	3.02099	0.00125976	2.52975e-05
chr19_23945718_23945916	0.101124	1.80768	1.34744	0.08892	0.0353284
chr19_24216177_24216375	0.202703	6.2217	4.63763	1.76216e-06	2.45905e-10
chr19_24269903_24270101	0.348	12.5354	9.34387	4.64396e-21	2.38858e-36
chr19_2476073_2476271	0.0562242	-0.143379	-0.106874	0.542555	0.557004
chr19_2627374_2627572	0.153435	4.08081	3.04182	0.00117576	2.24395e-05
chr19_2841385_2841583	0.167496	4.69183	3.49727	0.000235019	1.35383e-06
chr19_30097102_30097300	0.185185	5.46048	4.07022	2.34843e-05	2.37423e-08
chr19_33165968_33166166	0.0487715	-0.467229	-0.348271	0.636182	0.679832
chr19_33462758_33462956	0.0694382	0.430822	0.321133	0.374055	0.333299
chr19_35645556_35645754	0.0405404	-0.824901	-0.614878	0.730682	0.795286
chr19_35841615_35841813	0.200613	6.13089	4.56994	2.4393e-06	4.36942e-10
chr19_36139122_36139320	0.966186	39.3981	29.3672	7.20677e-190	0
chr19_36236424_36236622	0.0461548	-0.580934	-0.433026	0.667502	0.719358
chr19_36342228_36342426	0.154759	4.13835	3.08471	0.00101876	1.74909e-05
chr19_36505016_36505214	0.205476	6.34219	4.72744	1.13683e-06	1.13263e-10
chr19_36822496_36822694	0.139427	3.47213	2.58811	0.00482517	0.000258173
chr19_37288348_37288546	0.734284	29.321	21.8558	3.42568e-106	2.79937e-189
chr19_37407146_37407344	0.227273	7.28936	5.43346	2.76357e-08	1.55714e-13
chr19_37498683_37498881	0.128606	3.00188	2.23759	0.0126239	0.00134158
chr19_3762591_3762789	0.483091	18.4057	13.7195	3.8778e-43	5.91186e-76
chr19_37808736_37808934	0.732584	29.2472	21.8007	1.14197e-105	2.43965e-188
chr19_37825472_37825670	1.4436	60.1438	44.8309	0	0
chr19_3825574_3825772	0.0210523	-1.67174	-1.24611	0.893637	0.952712
chr19_39109753_39109951	0.564801	21.9563	16.3662	1.66814e-60	3.76784e-107
chr19_39322359_39322557	0.347218	12.5015	9.31854	5.8975e-21	3.66447e-36
chr19_39421506_39421704	0.057324	-0.0955883	-0.0712511	0.528401	0.538076
chr19_39694882_39695080	0.128508	2.99765	2.23444	0.0127271	0.00136033
chr19_3977897_3978095	0.131367	3.12188	2.32703	0.00998172	0.000898513
chr19_39881703_39881901	0.285713	9.82881	7.32636	1.18245e-13	4.23053e-23
chr19_39881803_39882001	0.22202	7.06111	5.26332	7.07368e-08	8.25884e-13
chr19_39897405_39897603	0.0754717	0.693001	0.51656	0.302732	0.244154
chr19_39926452_39926650	0.195122	5.89229	4.39209	5.61337e-06	1.90443e-09
chr19_39936177_39936375	0.289663	10.0005	7.45431	4.51713e-14	7.58436e-24
chr19_40324677_40324875	0.435374	16.3322	12.174	2.13918e-34	2.91242e-60
chr19_40476983_40477181	0.477065	18.1438	13.5243	5.61837e-42	7.18532e-74
chr19_40562005_40562203	0.230882	7.4462	5.55037	1.42536e-08	4.80349e-14
chr19_40931782_40931980	0.205557	6.34571	4.73007	1.12223e-06	1.10702e-10
chr19_41222697_41222895	0.257932	8.62164	6.42654	6.52705e-11	3.29996e-18
chr19_41257046_41257244	0.316531	11.168	8.32458	4.23152e-17	2.92442e-29
chr19_41816018_41816216	0.187294	5.55211	4.13852	1.74778e-05	1.41123e-08
chr19_41869783_41869981	0.200988	6.14718	4.58208	2.30186e-06	3.94373e-10
chr19_41903633_41903831	0.0566037	-0.126886	-0.0945807	0.537676	0.550485
chr19_41945719_41945917	0.738389	29.4994	21.9887	1.84516e-107	1.4646e-191
chr19_42364756_42364954	0.190476	5.69041	4.24161	1.10962e-05	6.33683e-09
chr19_4246992_4247190	1.25928	52.1343	38.8607	0	0
chr19_42721751_42721949	0.173041	4.93279	3.67688	0.000118052	4.0532e-07
chr19_42724168_42724366	0.233475	7.55889	5.63437	8.78517e-09	2.03264e-14
chr19_42829664_42829862	0.198154	6.02404	4.4903	3.55617e-06	8.5056e-10
chr19_43032538_43032736	0.146137	3.76369	2.80544	0.00251238	8.37109e-05
chr19_44100663_44100861	0.115942	2.4516	1.82741	0.0338191	0.00711122
chr19_44439320_44439518	0.244288	8.02875	5.9846	1.08461e-09	4.92347e-16
chr19_44669171_44669369	0.288461	9.94824	7.41538	6.064e-14	1.28346e-23
chr19_44860720_44860918	0.117299	2.51054	1.87135	0.0306483	0.00602726
chr19_4539948_4540146	0.247574	8.17155	6.09104	5.6089e-10	1.52225e-16
chr19_45549258_45549456	0.10651	2.04172	1.52189	0.0640183	0.0205897
chr19_45873732_45873930	0.0862538	1.16153	0.865799	0.1933	0.122714
chr19_45927049_45927247	1.11392	45.8179	34.1525	6.14242e-256	0
chr19_45971242_45971440	0.434233	16.2826	12.137	3.36299e-34	6.55909e-60
chr19_46171374_46171572	0.0405402	-0.824911	-0.614886	0.730685	0.795289
chr19_46195096_46195294	0.315656	11.13	8.29624	5.37281e-17	4.48286e-29
chr19_46234054_46234252	0.197491	5.99521	4.46881	3.93286e-06	1.01611e-09
chr19_47353997_47354195	0.0774029	0.776918	0.579112	0.281257	0.218604
chr19_4769092_4769290	0.0588227	-0.0304661	-0.0227093	0.509059	0.512152
chr19_48018165_48018363	0.068968	0.410388	0.305902	0.37984	0.34076
chr19_4844810_4845008	0.39603	14.6225	10.8996	5.78937e-28	1.00869e-48
chr19_48613979_48614177	0.0970862	1.63224	1.21666	0.111866	0.0513147
chr19_48894705_48894903	0.076923	0.756067	0.563569	0.286524	0.224805
chr19_49122333_49122531	0.424206	15.8469	11.8122	1.68746e-32	7.38251e-57
chr19_49339001_49339199	0.235934	7.66572	5.714	5.51761e-09	8.89149e-15
chr19_49375573_49375771	0.14375	3.65997	2.72813	0.00318477	0.000126123
chr19_49403483_49403681	0.249442	8.25271	6.15154	3.83669e-10	7.74186e-17
chr19_49468479_49468677	0.148155	3.85137	2.87079	0.00204722	5.87305e-05
chr19_49497048_49497246	0.172412	4.90545	3.6565	0.00012784	4.66072e-07
chr19_49990777_49990975	1.49057	62.1845	46.3521	0	0
chr19_49999578_49999776	1.30328	54.0461	40.2857	0	0
chr19_50380859_50381057	0.185185	5.46047	4.07021	2.34852e-05	2.37439e-08
chr19_50528520_50528718	0.0969914	1.62812	1.21359	0.112452	0.05175
chr19_50529181_50529379	0.0563904	-0.136159	-0.101492	0.54042	0.554152
chr19_50879642_50879840	0.149408	3.90581	2.91138	0.0017992	4.69548e-05
chr19_51307748_51307946	0.400001	14.7951	11.0282	1.3967e-28	7.87586e-50
chr19_53030841_53031039	0.760766	30.4718	22.7135	1.64656e-114	3.085e-204
chr19_5308964_5309162	0.267519	9.03823	6.73706	8.08097e-12	7.96122e-20
chr19_53238174_53238372	0.447017	16.8381	12.5511	1.96037e-36	6.40917e-64
chr19_53400800_53400998	0.179217	5.20114	3.87691	5.28961e-05	9.90356e-08
chr19_54041710_54041908	0.278817	9.52915	7.10299	6.10415e-13	7.92855e-22
chr19_54372877_54373075	0.262679	8.82788	6.58027	2.34797e-11	5.33371e-19
chr19_54372977_54373175	0.231292	7.46403	5.56366	1.3209e-08	4.19586e-14
chr19_54619046_54619244	0.521286	20.0654	14.9567	7.04531e-51	7.40517e-90
chr19_54676756_54676954	0.319904	11.3146	8.43383	1.6727e-17	5.55801e-30
chr19_54704949_54705147	0.0197545	-1.72814	-1.28815	0.901152	0.958018
chr19_55098537_55098735	0.0806456	0.917827	0.684145	0.246942	0.179355
chr19_55580782_55580980	0.100934	1.79946	1.34131	0.0899104	0.0359733
chr19_55718500_55718698	0.0582439	-0.0556133	-0.041454	0.516533	0.522175
chr19_55897193_55897391	0.162048	4.45509	3.3208	0.000448794	4.19299e-06
chr19_55972901_55973099	0.148584	3.87003	2.88471	0.00195889	5.44105e-05
chr19_56154894_56155092	0.397335	14.6793	10.9419	3.63476e-28	4.3775e-49
chr19_5622692_5622890	0.29476	10.2219	7.61939	1.2744e-14	7.90776e-25
chr19_5623046_5623244	0.592706	23.1689	17.27	3.95619e-67	4.6873e-119
chr19_5690223_5690421	0.164383	4.55654	3.39642	0.000341363	2.60021e-06
chr19_57351997_57352195	0.0840655	1.06644	0.794917	0.213331	0.143113
chr19_57791259_57791457	0.500594	19.1663	14.2865	1.32903e-46	3.54122e-82
chr19_57874802_57875000	0.204536	6.30135	4.697	1.32003e-06	1.4753e-10
chr19_5791082_5791280	0.107431	2.08175	1.55173	0.0603636	0.0186826
chr19_57946615_57946813	0.0291262	-1.3209	-0.984591	0.837588	0.906732
chr19_57988799_57988997	0.0325313	-1.17293	-0.874298	0.809022	0.879588
chr19_58193263_58193461	0.338029	12.1022	9.0209	9.32734e-20	5.14346e-34
chr19_58258107_58258305	0.161673	4.43881	3.30867	0.000468695	4.52282e-06
chr19_58361141_58361339	0.144069	3.67382	2.73845	0.00308644	0.000119474
chr19_58427830_58428028	0.104456	1.95247	1.45537	0.072784	0.025441
chr19_58458961_58459159	0.164671	4.56906	3.40576	0.000329905	2.44963e-06
chr19_58816650_58816848	0.516389	19.8526	14.7981	7.53942e-50	5.23204e-88
chr19_58838170_58838368	0.100015	1.75949	1.31152	0.0948412	0.0392469
chr19_58898550_58898748	0.903914	36.6921	27.3502	5.37566e-165	4.87718e-295
chr19_58978355_58978553	0.767775	30.7763	22.9406	9.1512e-117	2.71611e-208
chr19_59031065_59031263	0.261687	8.78481	6.54816	2.9125e-11	7.83166e-19
chr19_59066305_59066503	0.0615386	0.0875505	0.0652598	0.473984	0.465117
chr19_5978006_5978204	0.12821	2.98471	2.22479	0.0130476	0.00141923
chr19_6065826_6066024	0.0380952	-0.931157	-0.694081	0.756184	0.824114
chr19_6392937_6393135	0.0555556	-0.172434	-0.128532	0.551136	0.568452
chr19_6393069_6393267	0.357137	12.9325	9.63983	2.71393e-22	1.4755e-38
chr19_6720528_6720726	0.336842	12.0506	8.98245	1.32402e-19	9.6303e-34
chr19_6767373_6767571	0.0186918	-1.77431	-1.32256	0.90701	0.961994
chr19_7694317_7694515	0.32934	11.7246	8.73945	1.17119e-18	4.76874e-32
chr19_7694595_7694793	0.336448	12.0335	8.9697	1.48655e-19	1.18486e-33
chr19_8386159_8386357	0.37242	13.5966	10.1348	1.9349e-24	2.09765e-42
chr19_8386310_8386508	1.64866	69.0543	51.4728	0	0
chr19_893078_893276	0.361134	13.1062	9.76929	7.62619e-23	1.51778e-39
chr19_9250996_9251194	0.390679	14.39	10.7263	3.83116e-27	2.98833e-47
chr19_9546114_9546312	0.0420487	-0.75936	-0.566024	0.714311	0.776181
chr19_9649188_9649386	0.202157	6.19799	4.61996	1.91911e-06	2.85948e-10
chr19_9695081_9695279	0.365907	13.3136	9.92389	1.63867e-23	9.65064e-41
chr19_9731805_9732003	0.391792	14.4384	10.7623	2.59281e-27	1.48385e-47
chr19_9785633_9785831	0.613629	24.0781	17.9477	2.49989e-72	2.11997e-128
chr1_10003420_10003618	0.278186	9.50174	7.08256	7.07595e-13	1.0321e-21
chr1_100731700_100731898	0.107143	2.06926	1.54242	0.0614856	0.0192606
chr1_10092926_10093124	0.238094	7.75957	5.78395	3.6483e-09	4.26096e-15
chr1_101361590_101361788	0.0224736	-1.60998	-1.20007	0.884944	0.946299
chr1_104160026_104160224	0.0212767	-1.66199	-1.23884	0.892298	0.951743
chr1_104160126_104160324	0.139304	3.46677	2.58412	0.0048814	0.000263372
chr1_10532482_10532680	0.0880452	1.23937	0.923823	0.177789	0.107604
chr1_109234869_109235067	1.90969	80.3973	59.9278	0	0
chr1_109289297_109289495	0.09375	1.48727	1.1086	0.133801	0.0684723
chr1_109505987_109506185	0.0324685	-1.17566	-0.876331	0.809575	0.880134
chr1_109618486_109618684	0.259468	8.68838	6.47629	4.70033e-11	1.83815e-18
chr1_109633294_109633492	0.487244	18.5862	13.8541	6.01145e-44	2.07934e-77
chr1_109642787_109642985	0.863635	34.9418	26.0455	7.56417e-150	8.61639e-268
chr1_109642887_109643085	0.195532	5.91011	4.40537	5.28013e-06	1.70941e-09
chr1_109656599_109656797	0.222738	7.0923	5.28658	6.23138e-08	6.59489e-13
chr1_109656799_109656997	0.18038	5.25171	3.9146	4.52767e-05	7.53479e-08
chr1_109968935_109969133	0.191627	5.74043	4.27889	9.39129e-06	4.72189e-09
chr1_110091169_110091367	0.565719	21.9962	16.3959	1.0231e-60	1.56526e-107
chr1_110163636_110163834	0.0571425	-0.103475	-0.0771298	0.53074	0.541207
chr1_11018738_11018936	0.0252536	-1.48917	-1.11002	0.866506	0.931779
chr1_110282831_110283029	0.0600456	0.0226758	0.0169025	0.493257	0.490954
chr1_111506478_111506676	0.1513	3.98805	2.97268	0.00147607	3.33092e-05
chr1_111682631_111682829	0.298523	10.3855	7.74129	4.92077e-15	1.44375e-25
chr1_111682758_111682956	0.523824	20.1757	15.0389	2.04185e-51	8.00463e-91
chr1_111991751_111991949	0.70673	28.1237	20.9633	7.09818e-98	2.51528e-174
chr1_111992000_111992198	0.306926	10.7506	8.01346	5.57645e-16	2.94382e-27
chr1_112938755_112938953	1.28847	53.4025	39.806	0	0
chr1_113161648_113161846	0.346122	12.4538	9.28305	8.23473e-21	6.66299e-36
chr1_113162355_113162553	0.336713	12.045	8.97829	1.375e-19	1.03043e-33
chr1_113615737_113615935	0.433332	16.2435	12.1078	4.80096e-34	1.24245e-59
chr1_114447361_114447559	0.297874	10.3573	7.72028	5.80372e-15	1.93906e-25
chr1_115124130_115124328	0.300317	10.4634	7.7994	3.11023e-15	6.35878e-26
chr1_115259273_115259471	0.380413	13.9439	10.3937	1.32391e-25	1.71329e-44
chr1_115300512_115300710	0.318691	11.2619	8.39455	2.33846e-17	1.01219e-29
chr1_115323156_115323354	0.161174	4.4171	3.29249	0.000496521	5.00164e-06
chr1_118472143_118472341	0.232705	7.52541	5.60941	1.01506e-08	2.62768e-14
chr1_11866195_11866393	0.0845068	1.08561	0.809211	0.209197	0.138825
chr1_119683175_119683373	0.302524	10.5593	7.87089	1.76057e-15	2.29929e-26
chr1_120254441_120254639	0.215054	6.7584	5.03768	2.356e-07	6.9763e-12
chr1_12040383_12040581	0.0962198	1.59459	1.1886	0.117298	0.055402
chr1_120838230_120838428	0.0260869	-1.45296	-1.08303	0.860603	0.926883
chr1_143467527_143467725	0.363337	13.2019	9.84063	3.76198e-23	4.27874e-40
chr1_145039611_145039809	0.0982894	1.68452	1.25564	0.104624	0.0460404
chr1_145039911_145040109	0.571322	22.2397	16.5774	5.07895e-62	7.09843e-110
chr1_145096366_145096564	0.139754	3.48633	2.5987	0.00467894	0.00024485
chr1_145096566_145096764	0.175445	5.03722	3.75472	8.67663e-05	2.36171e-07
chr1_145470293_145470491	0.22444	7.16627	5.34171	4.60373e-08	3.85347e-13
chr1_145507548_145507746	0.293477	10.1662	7.57785	1.75662e-14	1.40311e-24
chr1_145610804_145611002	0.0777756	0.793114	0.591184	0.277199	0.213856
chr1_145826944_145827142	0.142894	3.62275	2.70038	0.00346299	0.000145745
chr1_146643947_146644145	0.133699	3.22321	2.40257	0.00814016	0.000633807
chr1_147994078_147994276	0.143159	3.63429	2.70898	0.00337447	0.000139374
chr1_148176221_148176419	0.359787	13.0476	9.72565	1.17203e-22	3.27793e-39
chr1_148241400_148241598	0.261916	8.79474	6.55557	2.77155e-11	7.1688e-19
chr1_149145326_149145524	0.0616445	0.0921558	0.0686926	0.472617	0.463287
chr1_149224080_149224278	0.0343513	-1.09385	-0.815348	0.792563	0.862989
chr1_149399107_149399305	0.0670391	0.326571	0.243425	0.403838	0.371996
chr1_149783699_149783897	0.258502	8.64638	6.44498	5.78077e-11	2.65786e-18
chr1_149783799_149783997	0.139406	3.47121	2.58742	0.00483483	0.000259062
chr1_149783899_149784097	0.0611354	0.0700312	0.052201	0.479184	0.472084
chr1_149858108_149858306	0.135863	3.31725	2.47267	0.00670543	0.000454534
chr1_149858208_149858406	0.147408	3.81891	2.8466	0.00220946	6.70226e-05
chr1_149859257_149859455	0.114286	2.37963	1.77376	0.038051	0.00866509
chr1_149859403_149859601	0.224998	7.19051	5.35978	4.16622e-08	3.2275e-13
chr1_149899579_149899777	0.805715	32.425	24.1695	2.33049e-129	6.09754e-231
chr1_149899697_149899895	0.679087	26.9225	20.0679	7.03727e-90	5.98757e-160
chr1_150039779_150039977	0.0454547	-0.611358	-0.455704	0.675699	0.729519
chr1_150208373_150208571	0.0973191	1.64236	1.22421	0.110437	0.0502581
chr1_150241292_150241490	0.622608	24.4683	18.2385	1.27589e-74	1.60883e-132
chr1_150254874_150255072	0.402	14.882	11.093	6.78579e-29	2.15794e-50
chr1_150266206_150266404	0.571428	22.2443	16.5808	4.79735e-62	6.40689e-110
chr1_150459802_150460000	0.137336	3.38124	2.52037	0.00586166	0.000360793
chr1_150601956_150602154	0.189194	5.6347	4.20008	1.33407e-05	8.76805e-09
chr1_150669511_150669709	0.075761	0.705572	0.525931	0.299468	0.240227
chr1_150898748_150898946	0.326465	11.5997	8.64636	2.65846e-18	2.06805e-31
chr1_150979162_150979360	0.0214609	-1.65398	-1.23287	0.891188	0.950934
chr1_150979262_150979460	0.308841	10.8338	8.07551	3.35981e-16	1.1897e-27
chr1_150979362_150979560	0.0994167	1.73351	1.29215	0.0981527	0.0415028
chr1_151138480_151138678	0.358889	13.0086	9.69658	1.55894e-22	5.46481e-39
chr1_151162544_151162742	0.265457	8.94863	6.67027	1.27666e-11	1.79968e-19
chr1_151227138_151227336	0.538959	20.8334	15.5291	1.10217e-54	1.07889e-96
chr1_151319641_151319839	0.135135	3.28562	2.44909	0.00716089	0.000508788
chr1_151371968_151372166	0.209986	6.53818	4.87353	5.48107e-07	3.11369e-11
chr1_151431564_151431762	0.0388345	-0.899033	-0.670136	0.748614	0.815683
chr1_151689173_151689371	0.148595	3.87048	2.88504	0.00195682	5.43106e-05
chr1_151804185_151804383	0.225252	7.20157	5.36802	3.98026e-08	2.97619e-13
chr1_153508535_153508733	0.0361446	-1.01592	-0.757262	0.775554	0.845166
chr1_153585452_153585650	0.0543394	-0.225283	-0.167925	0.566679	0.58912
chr1_153588695_153588893	0.279903	9.57636	7.13818	4.72859e-13	5.02606e-22
chr1_153599931_153600129	0.204693	6.30819	4.7021	1.28751e-06	1.41162e-10
chr1_153606461_153606659	0.955502	38.9338	29.0211	1.78159e-185	0
chr1_153643359_153643557	0.142129	3.58954	2.67563	0.00372942	0.000165628
chr1_153700454_153700652	0.050518	-0.391338	-0.291702	0.614743	0.652226
chr1_153958688_153958886	0.308943	10.8383	8.0788	3.27049e-16	1.13373e-27
chr1_153963187_153963385	0.155556	4.17297	3.11051	0.000933812	1.50329e-05
chr1_154155558_154155756	0.715517	28.5055	21.2479	1.72348e-100	5.00276e-179
chr1_154245030_154245228	0.225807	7.22565	5.38597	3.60267e-08	2.49349e-13
chr1_154378487_154378685	0.435452	16.3356	12.1765	2.07405e-34	2.75524e-60
chr1_154378712_154378910	0.0487192	-0.4695	-0.349963	0.636817	0.680644
chr1_154600319_154600517	0.206692	6.39505	4.76685	9.35653e-07	8.02456e-11
chr1_15478950_15479148	0.0929998	1.45467	1.0843	0.139115	0.0728806
chr1_154909084_154909282	0.145591	3.73995	2.78774	0.00265383	9.2029e-05
chr1_154928494_154928692	0.0315128	-1.21719	-0.907286	0.817872	0.888233
chr1_154946736_154946934	0.0380933	-0.93124	-0.694142	0.756204	0.824135
chr1_154947063_154947261	0.0516799	-0.340847	-0.254066	0.600278	0.63339
chr1_155112915_155113113	0.463765	17.5659	13.0936	1.79205e-39	2.2472e-69
chr1_155145656_155145854	0.11399	2.36676	1.76418	0.0388511	0.00897219
chr1_155178936_155179134	1.00978	41.2926	30.7794	2.47443e-208	0
chr1_155210943_155211141	0.0813809	0.949779	0.707962	0.239485	0.171112
chr1_155214354_155214552	0.346889	12.4872	9.3079	6.51947e-21	4.3853e-36
chr1_155231964_155232162	0.0488384	-0.464324	-0.346105	0.635368	0.678792
chr1_155232164_155232362	0.541273	20.9339	15.6041	3.41473e-55	1.31438e-97
chr1_155278600_155278798	0.037037	-0.977138	-0.728355	0.766802	0.83575
chr1_155532930_155533128	0.376474	13.7727	10.2661	5.00658e-25	1.85942e-43
chr1_155658799_155658997	0.0493918	-0.440275	-0.328179	0.628612	0.670131
chr1_155826899_155827097	0.0955929	1.56735	1.16829	0.121344	0.0585169
chr1_155829246_155829444	0.151737	4.00702	2.98681	0.00140951	3.07454e-05
chr1_155881064_155881262	0.106381	2.03615	1.51774	0.0645403	0.0208677
chr1_155904098_155904296	0.21367	6.69827	4.99286	2.97451e-07	1.0545e-11
chr1_155990612_155990810	0.643392	25.3714	18.9117	4.56488e-80	2.60946e-142
chr1_156024512_156024710	0.192674	5.78589	4.31278	8.06075e-06	3.60648e-09
chr1_156030855_156031053	0.1501	3.9359	2.9338	0.00167418	4.1443e-05
chr1_156084441_156084639	0.045045	-0.629159	-0.468972	0.680455	0.735377
chr1_156163823_156164021	1.92857	81.2176	60.5393	0	0
chr1_156182699_156182897	0.222229	7.07021	5.27011	6.81719e-08	7.73492e-13
chr1_156265353_156265551	0.238996	7.7988	5.81319	3.0646e-09	3.12496e-15
chr1_156571150_156571348	0.447744	16.8697	12.5746	1.45584e-36	3.7572e-64
chr1_156675262_156675460	0.0657896	0.272274	0.202952	0.419586	0.392706
chr1_156698122_156698320	0.583329	22.7614	16.9663	7.29372e-65	5.52835e-115
chr1_156710796_156710994	0.0487805	-0.466838	-0.347979	0.636072	0.679692
chr1_156737234_156737432	0.0258615	-1.46276	-1.09034	0.862218	0.928234
chr1_157108066_157108264	0.34585	12.442	9.27422	8.94651e-21	7.72948e-36
chr1_15764831_15765029	0.0354072	-1.04796	-0.781147	0.782642	0.852672
chr1_15853270_15853468	0.133333	3.20732	2.39072	0.00840762	0.000669892
chr1_159894221_159894419	0.0235294	-1.5641	-1.16587	0.878167	0.941103
chr1_160254821_160255019	0.0347495	-1.07654	-0.802451	0.788854	0.859158
chr1_160312947_160313145	0.21632	6.81343	5.0787	1.90009e-07	4.76493e-12
chr1_160313147_160313345	0.0780339	0.804337	0.59955	0.274403	0.210601
chr1_160313247_160313445	0.188678	5.61227	4.18336	1.43615e-05	9.98462e-09
chr1_160990747_160990945	0.0909083	1.36379	1.01656	0.154681	0.0863176
chr1_160990826_160991024	0.290909	10.0546	7.49468	3.32302e-14	4.38263e-24
chr1_161015628_161015826	0.397722	14.6961	10.9544	3.16534e-28	3.41606e-49
chr1_161123717_161123915	0.374391	13.6822	10.1987	1.00479e-24	6.48126e-43
chr1_161136148_161136346	0.0546446	-0.212019	-0.158038	0.562786	0.583954
chr1_161172066_161172264	0.385697	14.1735	10.5649	2.16702e-26	6.67907e-46
chr1_161284095_161284293	0.459409	17.3766	12.9525	1.13777e-38	6.20382e-68
chr1_161719487_161719685	0.494833	18.9159	14.0999	1.9024e-45	4.21511e-80
chr1_161736000_161736198	0.405227	15.0222	11.1975	2.09733e-29	2.62687e-51
chr1_161736200_161736398	0.0645223	0.217208	0.161906	0.43569	0.414023
chr1_16302487_16302685	0.268717	9.09027	6.77585	6.18379e-12	4.93969e-20
chr1_163039102_163039300	0.091263	1.3792	1.02805	0.151964	0.0839171
chr1_165414264_165414462	0.166622	4.65384	3.46896	0.000261241	1.62901e-06
chr1_165414364_165414562	0.0392149	-0.882503	-0.657814	0.744671	0.811247
chr1_1655700_1655898	0.434236	16.2827	12.1371	3.35846e-34	6.54324e-60
chr1_165737991_165738189	0.085849	1.14394	0.852686	0.196917	0.126325
chr1_166246725_166246923	0.336306	12.0273	8.96511	1.54988e-19	1.27675e-33
chr1_166845386_166845584	0.0451978	-0.622521	-0.464024	0.678685	0.7332
chr1_16693638_16693836	0.0512812	-0.358173	-0.266981	0.605258	0.639893
chr1_167190044_167190242	0.591646	23.1228	17.2357	7.17076e-67	1.36492e-118
chr1_169075491_169075689	0.229509	7.38655	5.5059	1.8364e-08	7.53453e-14
chr1_169336924_169337122	0.0787739	0.836494	0.62352	0.266472	0.201438
chr1_169337366_169337564	0.367348	13.3762	9.97056	1.02538e-23	4.16566e-41
chr1_170501207_170501405	0.0277777	-1.37949	-1.02827	0.848088	0.916128
chr1_17222400_17222598	0.0389416	-0.894377	-0.666665	0.747507	0.81444
chr1_17231611_17231809	0.357139	12.9326	9.63989	2.71238e-22	1.47398e-38
chr1_173793711_173793909	0.206004	6.36515	4.74456	1.04482e-06	9.75506e-11
chr1_17380451_17380649	0.044643	-0.646627	-0.481993	0.685094	0.741063
chr1_173837013_173837211	0.0410943	-0.800834	-0.596938	0.724726	0.788386
chr1_174768857_174769055	0.0830877	1.02394	0.763244	0.222659	0.152931
chr1_174923765_174923963	0.26785	9.05261	6.74778	7.50604e-12	6.97926e-20
chr1_174992459_174992657	0.280373	9.59679	7.15341	4.23245e-13	4.12369e-22
chr1_178340483_178340681	0.107144	2.06928	1.54243	0.0614841	0.0192599
chr1_17906891_17907089	0.047399	-0.526871	-0.392728	0.65274	0.700858
chr1_179846806_179847004	0.214479	6.73343	5.01907	2.59611e-07	8.28566e-12
chr1_179851338_179851536	0.0641023	0.198954	0.148299	0.441053	0.421149
chr1_179851768_179851966	0.239912	7.83857	5.84284	2.56594e-09	2.27855e-15
chr1_179851868_179852066	0.0322437	-1.18543	-0.883612	0.811547	0.882075
chr1_179851968_179852166	0.0999999	1.75885	1.31104	0.094922	0.0393014
chr1_183155309_183155507	0.149925	3.92829	2.92813	0.00170503	4.2776e-05
chr1_183387388_183387586	0.0704224	0.473587	0.35301	0.36204	0.317897
chr1_183604760_183604958	0.0333334	-1.13808	-0.848318	0.80187	0.872456
chr1_183605149_183605347	0.488722	18.6504	13.9019	3.08358e-44	6.27043e-78
chr1_184943531_184943729	0.354839	12.8326	9.56538	5.58973e-22	5.38386e-38
chr1_186344879_186345077	0.132581	3.17462	2.36635	0.00898221	0.00075016
chr1_186649454_186649652	0.0784315	0.821618	0.612431	0.270126	0.205647
chr1_193028662_193028860	0.174773	5.00803	3.73297	9.4619e-05	2.74949e-07
chr1_193091277_193091475	0.0892872	1.29334	0.964052	0.16751	0.0979464
chr1_197170331_197170529	0.339042	12.1462	9.05373	6.9086e-20	3.00494e-34
chr1_201140095_201140293	0.0788267	0.838791	0.625231	0.26591	0.200793
chr1_201924540_201924738	1.37018	56.9531	42.4526	0	0
chr1_201979641_201979839	0.0444458	-0.655197	-0.488382	0.68736	0.74383
chr1_203444838_203445036	0.0967742	1.61868	1.20656	0.113801	0.0527582
chr1_203595855_203596053	0.15873	4.31091	3.21334	0.000656009	8.12908e-06
chr1_203830652_203830850	0.601811	23.5646	17.5649	2.28627e-69	4.45154e-123
chr1_204183014_204183212	0.576954	22.4844	16.7598	2.40151e-63	2.94889e-112
chr1_204283293_204283491	0.103095	1.89335	1.41129	0.0790791	0.0291559
chr1_204380843_204381041	0.104166	1.93989	1.44599	0.07409	0.0261962
chr1_205091019_205091217	0.186489	5.51714	4.11246	1.95736e-05	1.72278e-08
chr1_205290775_205290973	0.114286	2.37963	1.77377	0.0380509	0.00866504
chr1_205719207_205719405	0.37501	13.7091	10.2187	8.17313e-25	4.4761e-43
chr1_205744485_205744683	0.127749	2.96465	2.20984	0.0135582	0.00151514
chr1_205819144_205819342	0.2	6.10424	4.55008	2.68133e-06	5.16458e-10
chr1_206137701_206137899	0.0624146	0.125619	0.0936358	0.462699	0.450017
chr1_206939816_206940014	0.0983564	1.68743	1.2578	0.104231	0.0457602
chr1_207119702_207119900	0.176948	5.10253	3.80341	7.13592e-05	1.67568e-07
chr1_207205988_207206186	0.199308	6.0742	4.52768	2.98171e-06	6.2305e-10
chr1_207224234_207224432	0.64891	25.6112	19.0905	1.51514e-81	5.72687e-145
chr1_20834512_20834710	1.15896	47.7749	35.6112	4.69408e-278	0
chr1_20987907_20988105	0.265823	8.96452	6.68212	1.17756e-11	1.55817e-19
chr1_20988007_20988205	0.3106	10.9103	8.13248	2.103e-16	5.14702e-28
chr1_209957791_209957989	0.21143	6.60093	4.92031	4.32034e-07	2.04286e-11
chr1_211556057_211556255	0.219272	6.94171	5.17432	1.14371e-07	1.93696e-12
chr1_212964993_212965191	0.0344814	-1.08819	-0.811132	0.791355	0.861744
chr1_212965141_212965339	0.0557765	-0.162833	-0.121375	0.548303	0.564675
chr1_213188720_213188918	0.0495852	-0.431871	-0.321915	0.626241	0.667082
chr1_214161231_214161429	0.176151	5.06792	3.77761	7.91709e-05	2.01092e-07
chr1_21503273_21503471	0.135	3.27972	2.44469	0.00724877	0.000519544
chr1_217804306_217804504	0.244337	8.03087	5.98618	1.07416e-09	4.83937e-16
chr1_217804602_217804800	0.114691	2.39724	1.78689	0.0369773	0.00825953
chr1_220263042_220263240	0.0309291	-1.24255	-0.926195	0.822828	0.892984
chr1_220445641_220445839	0.0999249	1.75559	1.30861	0.0953333	0.0395792
chr1_221915320_221915518	0.119892	2.62322	1.95534	0.0252714	0.00435509
chr1_222817382_222817580	0.157142	4.2419	3.16189	0.000783736	1.1082e-05
chr1_22331886_22332084	0.0314182	-1.2213	-0.910353	0.818682	0.889014
chr1_22332120_22332318	0.14104	3.54219	2.64034	0.00414118	0.000198407
chr1_22351899_22352097	0.304547	10.6472	7.9364	1.04069e-15	8.98236e-27
chr1_224180187_224180385	0.0518504	-0.333438	-0.248543	0.598143	0.630598
chr1_224517770_224517968	0.0373912	-0.961748	-0.716883	0.763277	0.831912
chr1_225965474_225965672	0.140351	3.51227	2.61803	0.00442196	0.000222151
chr1_226186945_226187143	0.348125	12.5409	9.34793	4.46912e-21	2.22992e-36
chr1_226187252_226187450	0.12116	2.67833	1.99641	0.0229445	0.00369956
chr1_227506018_227506216	0.623182	24.4932	18.2571	9.08073e-75	8.73055e-133
chr1_227751154_227751352	0.0219415	-1.6331	-1.21731	0.888256	0.948776
chr1_228284699_228284897	0.107971	2.10522	1.56922	0.0582982	0.0176362
chr1_228296876_228297074	1.17187	48.3361	36.0295	1.44319e-284	0
chr1_228645469_228645667	0.0375921	-0.953017	-0.710375	0.761264	0.829709
chr1_228645731_228645929	0.15385	4.09885	3.05527	0.0011243	2.07603e-05
chr1_229643943_229644141	0.790696	31.7724	23.683	2.69925e-124	7.79801e-222
chr1_22970038_22970236	0.0607066	0.051399	0.0383126	0.484719	0.479504
chr1_230849786_230849984	0.0402314	-0.838331	-0.624889	0.733978	0.799078
chr1_231114741_231114939	0.18889	5.62149	4.19024	1.39332e-05	9.46593e-09
chr1_231473506_231473704	0.0894014	1.2983	0.967748	0.166585	0.0970921
chr1_231664345_231664543	0.69927	27.7995	20.7217	1.10449e-95	2.19679e-170
chr1_234492804_234493002	0.136	3.32322	2.47711	0.00662252	0.000444931
chr1_234743705_234743903	0.350189	12.6306	9.41479	2.37016e-21	7.16037e-37
chr1_234743905_234744103	0.106661	2.04828	1.52678	0.0634079	0.0202663
chr1_235292241_235292439	0.197737	6.00591	4.47678	3.78884e-06	9.51312e-10
chr1_235324447_235324645	0.427083	15.9719	11.9054	5.54646e-33	1.00271e-57
chr1_235491382_235491580	0.0222232	-1.62086	-1.20818	0.886511	0.947476
chr1_235491789_235491987	0.150168	3.93886	2.93601	0.00166231	4.09347e-05
chr1_236558652_236558850	0.237038	7.7137	5.74976	4.46856e-09	6.11132e-15
chr1_23670692_23670890	0.172042	4.88937	3.64452	0.000133946	5.0579e-07
chr1_236767716_236767914	0.709952	28.2637	21.0677	7.8757e-99	4.8277e-176
chr1_236958533_236958731	0.147265	3.81271	2.84198	0.00224174	6.87268e-05
chr1_23885863_23886061	0.16776	4.7033	3.50582	0.000227601	1.27996e-06
chr1_240286377_240286575	0.108931	2.14694	1.60032	0.0547638	0.0158991
chr1_241682937_241683135	0.149733	3.91995	2.92192	0.00173942	4.42834e-05
chr1_243419267_243419465	0.0363636	-1.0064	-0.750168	0.773423	0.842889
chr1_245132880_245133078	0.192313	5.77021	4.30109	8.49787e-06	3.95859e-09
chr1_2457932_2458130	0.227918	7.3174	5.45436	2.45745e-08	1.2641e-13
chr1_246729425_246729623	0.170943	4.84159	3.6089	0.000153747	6.44017e-07
chr1_247267560_247267758	0.16943	4.77585	3.5599	0.000185499	8.94752e-07
chr1_247374044_247374242	0.323729	11.4808	8.55772	5.75601e-18	8.24025e-31
chr1_24740129_24740327	0.165049	4.5855	3.41802	0.000315396	2.26446e-06
chr1_25573826_25574024	0.036036	-1.02064	-0.76078	0.776606	0.846287
chr1_25664755_25664953	0.212963	6.66755	4.96996	3.34826e-07	1.30056e-11
chr1_26503901_26504099	0.242297	7.94224	5.92011	1.60859e-09	9.92817e-16
chr1_26798880_26799078	0.107145	2.06931	1.54246	0.0614814	0.0192585
chr1_27240356_27240554	0.168209	4.72279	3.52035	0.000215489	1.16315e-06
chr1_27998608_27998806	0.137534	3.38987	2.5268	0.00575543	0.000349629
chr1_28099650_28099848	0.357051	12.9287	9.63704	2.78871e-22	1.54912e-38
chr1_28157214_28157412	1.20483	49.7681	37.097	1.57133e-301	0
chr1_28240970_28241168	0.167153	4.67691	3.48615	0.000245011	1.45613e-06
chr1_28415007_28415205	0.217875	6.88097	5.12905	1.45604e-07	2.97226e-12
chr1_28559428_28559626	0.33203	11.8415	8.8266	5.39532e-19	1.19093e-32
chr1_28562586_28562784	0.151351	3.99027	2.97433	0.00146814	3.2999e-05
chr1_28655468_28655666	0.0285714	-1.345	-1.00256	0.841963	0.910688
chr1_28696108_28696306	0.635323	25.0208	18.6504	6.26918e-78	1.81698e-138
chr1_28832406_28832604	0.635211	25.0159	18.6468	6.70815e-78	2.05204e-138
chr1_28832476_28832674	0.0485428	-0.477168	-0.355679	0.63896	0.683379
chr1_31538451_31538649	0.685292	27.1921	20.2689	1.20988e-91	4.02377e-163
chr1_31769508_31769706	0.142883	3.6223	2.70005	0.0034665	0.000146
chr1_32101006_32101204	0.178061	5.15094	3.83949	6.16454e-05	1.29594e-07
chr1_32573572_32573770	0.764833	30.6485	22.8453	8.14274e-116	1.38373e-206
chr1_32666140_32666338	0.195252	5.89794	4.3963	5.50559e-06	1.84036e-09
chr1_32687845_32688043	0.904122	36.7012	27.3569	4.47012e-165	3.5e-295
chr1_32687924_32688122	1.10465	45.4148	33.852	1.69603e-251	0
chr1_32688049_32688247	0.0639647	0.192974	0.143842	0.442812	0.423489
chr1_32859637_32859835	0.0830789	1.02357	0.762962	0.222743	0.15302
chr1_32859929_32860127	0.44459	16.7326	12.4724	5.27675e-36	3.78992e-63
chr1_33116054_33116252	0.215569	6.78078	5.05437	2.15909e-07	5.97636e-12
chr1_33116722_33116920	0.163743	4.52876	3.37572	0.000368117	2.96658e-06
chr1_35497429_35497627	0.185328	5.46669	4.07485	2.30219e-05	2.29255e-08
chr1_35658609_35658807	0.225389	7.2075	5.37244	3.88382e-08	2.84936e-13
chr1_36022888_36023086	0.262425	8.81689	6.57207	2.48098e-11	5.88429e-19
chr1_36107002_36107200	0.271427	9.20803	6.86363	3.35668e-12	1.66086e-20
chr1_36549609_36549807	0.0459766	-0.588679	-0.438799	0.669596	0.721962
chr1_36689940_36690138	0.285319	9.81171	7.31361	1.30028e-13	5.01267e-23
chr1_36915934_36916132	0.365977	13.3166	9.92617	1.60168e-23	9.26379e-41
chr1_38022485_38022683	0.553109	21.4482	15.9874	7.81703e-58	2.37133e-102
chr1_38061430_38061628	0.102041	1.84753	1.37714	0.0842337	0.0323349
chr1_38325166_38325364	0.235607	7.6515	5.7034	5.87211e-09	9.93239e-15
chr1_38412603_38412801	0.262815	8.83381	6.58468	2.27927e-11	5.05869e-19
chr1_38478320_38478518	0.628502	24.7244	18.4295	3.81168e-76	2.92371e-135
chr1_39491935_39492133	0.715406	28.5007	21.2443	1.86097e-100	5.7431e-179
chr1_39624458_39624656	0.30173	10.5248	7.84515	2.16217e-15	3.31983e-26
chr1_40349053_40349251	0.666659	26.3824	19.6654	2.13551e-86	1.08985e-153
chr1_41157256_41157454	0.266667	9.00119	6.70945	9.76788e-12	1.11643e-19
chr1_43637843_43638041	0.0649378	0.235262	0.175364	0.430397	0.407003
chr1_43815060_43815258	0.0633928	0.168127	0.125321	0.450135	0.433242
chr1_43855355_43855553	0.506232	19.4113	14.4691	9.49863e-48	3.09847e-84
chr1_44115721_44115919	0.058821	-0.0305384	-0.0227632	0.50908	0.512181
chr1_44482740_44482938	0.24479	8.05057	6.00086	9.81372e-10	4.12059e-16
chr1_45241139_45241337	1.20161	49.6282	36.9926	7.5173e-300	0
chr1_45987454_45987652	0.444444	16.7263	12.4677	5.59737e-36	4.21315e-63
chr1_46016433_46016631	0.0576895	-0.0797057	-0.0594123	0.523688	0.531764
chr1_46016646_46016844	0.245364	8.07551	6.01945	8.75047e-10	3.35984e-16
chr1_46049630_46049828	0.405797	15.0469	11.2159	1.70297e-29	1.80795e-51
chr1_46152095_46152293	0.309258	10.852	8.089	3.00775e-16	9.76046e-28
chr1_46153778_46153976	0.132241	3.15987	2.35536	0.00925248	0.000789193
chr1_46598197_46598395	0.025974	-1.45787	-1.08669	0.861413	0.927562
chr1_46646116_46646314	0.0379706	-0.93657	-0.698115	0.757447	0.82551
chr1_46768999_46769197	0.0886073	1.2638	0.94203	0.173089	0.103151
chr1_46769269_46769467	0.114645	2.39525	1.78541	0.0370971	0.00830442
chr1_46806355_46806553	0.388889	14.3122	10.6683	7.16279e-27	9.17689e-47
chr1_47069811_47070009	0.325226	11.5458	8.6062	3.77613e-18	3.8755e-31
chr1_47655639_47655837	0.0430107	-0.717557	-0.534864	0.703628	0.763485
chr1_50574518_50574716	0.0207239	-1.68601	-1.25674	0.895577	0.954103
chr1_51795328_51795526	0.322224	11.4154	8.50896	8.77507e-18	1.75239e-30
chr1_51887696_51887894	0.0456621	-0.602344	-0.448985	0.673279	0.726527
chr1_52082705_52082903	0.71411	28.4444	21.2023	4.54275e-100	2.85781e-178
chr1_52195461_52195659	0.037037	-0.977139	-0.728355	0.766802	0.83575
chr1_52344311_52344509	0.0619047	0.103463	0.0771208	0.469264	0.458798
chr1_52499372_52499570	0.608986	23.8763	17.7973	3.70685e-71	2.69871e-126
chr1_52520754_52520952	0.166667	4.65579	3.4704	0.000259838	1.61374e-06
chr1_52870206_52870404	0.184402	5.42647	4.04487	2.61763e-05	2.874e-08
chr1_53393694_53393892	0.0593196	-0.00887143	-0.00661273	0.502638	0.503539
chr1_53480535_53480733	0.117035	2.4991	1.86282	0.0312439	0.00622549
chr1_53704078_53704276	0.32823	11.6764	8.70351	1.60881e-18	8.41745e-32
chr1_54355363_54355561	0.398375	14.7244	10.9755	2.50519e-28	2.24572e-49
chr1_54518782_54518980	0.495487	18.9443	14.121	1.40911e-45	2.4587e-80
chr1_54518982_54519180	0.146548	3.78153	2.81874	0.00241064	7.79332e-05
chr1_54665762_54665960	0.0529428	-0.285971	-0.213162	0.5844	0.61255
chr1_57284971_57285169	0.263156	8.84862	6.59573	2.11587e-11	4.43032e-19
chr1_59165640_59165838	0.290961	10.0569	7.49637	3.2805e-14	4.28295e-24
chr1_59249566_59249764	0.0330869	-1.14879	-0.8563	0.804084	0.874678
chr1_59249666_59249864	0.0394472	-0.872407	-0.650289	0.742247	0.808507
chr1_59249766_59249964	0.45333	17.1124	12.7555	1.45164e-37	5.99331e-66
chr1_61548165_61548363	0.135631	3.30715	2.46514	0.00684808	0.000471255
chr1_62190706_62190904	0.396691	14.6513	10.921	4.57487e-28	6.6128e-49
chr1_6259566_6259764	0.371577	13.56	10.1076	2.55733e-24	3.45803e-42
chr1_62902637_62902835	0.188235	5.59303	4.16902	1.52956e-05	1.11572e-08
chr1_64058833_64059031	0.121216	2.68078	1.99824	0.0228451	0.00367253
chr1_6639983_6640181	0.243902	8.01198	5.9721	1.17111e-09	5.64387e-16
chr1_66999710_66999908	0.066668	0.310444	0.231404	0.408501	0.378112
chr1_68516225_68516423	0.0235312	-1.56402	-1.16581	0.878155	0.941093
chr1_70671302_70671500	0.365273	13.286	9.90335	2.01273e-23	1.39499e-40
chr1_70820290_70820488	0.0695651	0.436337	0.325244	0.372498	0.331296
chr1_70876842_70877040	0.0388345	-0.89903	-0.670133	0.748614	0.815682
chr1_713918_714116	0.235914	7.66485	5.71335	5.53875e-09	8.95215e-15
chr1_71546625_71546823	0.130313	3.07606	2.29288	0.0109274	0.00104879
chr1_74663858_74664056	1.72726	72.4698	54.0187	0	0
chr1_74895257_74895455	0.177299	5.11779	3.81478	6.81514e-05	1.54566e-07
chr1_75198620_75198818	0.147727	3.8328	2.85695	0.00213864	6.33466e-05
chr1_75198799_75198997	0.466992	17.7061	13.1981	4.49974e-40	1.88009e-70
chr1_76251830_76252028	0.0729441	0.583166	0.434689	0.331894	0.279891
chr1_77685006_77685204	0.378145	13.8454	10.3203	2.85302e-25	6.78542e-44
chr1_78148231_78148429	0.223744	7.13603	5.31917	5.21215e-08	4.8033e-13
chr1_78470520_78470718	0.153878	4.10009	3.05619	0.00112085	2.06497e-05
chr1_84629926_84630124	0.128205	2.98447	2.22461	0.0130537	0.00142036
chr1_84972156_84972354	0.145455	3.73407	2.78336	0.00268994	9.42047e-05
chr1_85725208_85725406	0.113334	2.33825	1.74293	0.0406734	0.00968705
chr1_86861868_86862066	0.182808	5.35718	3.99322	3.25906e-05	4.22649e-08
chr1_87018240_87018438	0.311108	10.9323	8.14892	1.83588e-16	4.0369e-28
chr1_87379697_87379895	0.102924	1.8859	1.40574	0.0799002	0.0296542
chr1_89357185_89357383	0.0855037	1.12893	0.841502	0.200033	0.129463
chr1_8938647_8938845	0.0555554	-0.172441	-0.128537	0.551138	0.568454
chr1_92351535_92351733	0.0646384	0.222249	0.165664	0.434211	0.41206
chr1_92351835_92352033	0.137254	3.37771	2.51773	0.00590567	0.000365462
chr1_93297503_93297701	1.17725	48.5695	36.2035	2.67893e-287	0
chr1_93544763_93544961	0.0445512	-0.650617	-0.484967	0.68615	0.742353
chr1_93645866_93646064	0.258838	8.66099	6.45586	5.38013e-11	2.33851e-18
chr1_93645966_93646164	0.208797	6.4865	4.83501	6.6569e-07	4.39268e-11
chr1_94057495_94057693	0.191904	5.75245	4.28786	9.02029e-06	4.39787e-09
chr1_94344631_94344829	0.144322	3.68482	2.74665	0.00301033	0.00011443
chr1_948779_948977	0.516519	19.8583	14.8023	7.0793e-50	4.6725e-88
chr1_95538362_95538560	1.21799	50.3398	37.5231	0	0
chr20_10199441_10199639	0.407177	15.1069	11.2607	1.02615e-29	7.28763e-52
chr20_1099189_1099387	0.130587	3.08797	2.30176	0.0106744	0.00100766
chr20_11898440_11898638	0.139535	3.4768	2.59159	0.00477663	0.000253717
chr20_1305956_1306154	0.0694449	0.431111	0.321348	0.373973	0.333194
chr20_1309710_1309908	0.177419	5.12301	3.81867	6.70853e-05	1.50345e-07
chr20_13619455_13619653	0.261605	8.78126	6.54551	2.96456e-11	8.08297e-19
chr20_13765606_13765804	0.17214	4.89361	3.64768	0.00013231	4.95013e-07
chr20_16710577_16710775	0.42324	15.8049	11.7809	2.4473e-32	1.43842e-56
chr20_17943466_17943664	0.0731829	0.593544	0.442426	0.329091	0.276408
chr20_18269075_18269273	0.0384619	-0.915224	-0.682205	0.752445	0.819963
chr20_18447962_18448160	0.838481	33.8488	25.2308	9.20753e-141	1.88915e-251
chr20_19955926_19956124	0.0533326	-0.269029	-0.200533	0.579468	0.606046
chr20_19956026_19956224	0.284087	9.75819	7.27372	1.74864e-13	8.50823e-23
chr20_20032988_20033186	0.272718	9.26413	6.90545	2.50227e-12	9.83356e-21
chr20_20433054_20433252	0.072072	0.545269	0.406442	0.342209	0.292784
chr20_21283890_21284088	0.931043	37.871	28.2289	1.29282e-175	0
chr20_23066873_23067071	0.175511	5.04013	3.75689	8.60188e-05	2.32612e-07
chr20_2451313_2451511	0.498362	19.0693	14.2142	3.7415e-46	2.27221e-81
chr20_24911211_24911409	0.0769232	0.756077	0.563577	0.286521	0.224802
chr20_2644731_2644929	0.0772522	0.770373	0.574233	0.282905	0.220539
chr20_30310542_30310740	0.376472	13.7727	10.2661	5.00888e-25	1.86096e-43
chr20_30496338_30496536	0.0294095	-1.30858	-0.975414	0.835323	0.904662
chr20_30697447_30697645	0.206807	6.40004	4.77057	9.18541e-07	7.76667e-11
chr20_31989230_31989428	0.315227	11.1113	8.28233	6.03965e-17	5.52642e-29
chr20_32699940_32700138	0.0409847	-0.805595	-0.600487	0.725909	0.789762
chr20_32950985_32951183	0.54769	21.2128	15.8119	1.2874e-56	3.63899e-100
chr20_33104122_33104320	0.378379	13.8555	10.3279	2.63597e-25	5.88812e-44
chr20_33134552_33134750	0.037037	-0.977139	-0.728355	0.766802	0.83575
chr20_33735024_33735222	0.356247	12.8938	9.61099	3.59289e-22	2.43909e-38
chr20_33872234_33872432	0.0833333	1.03462	0.771201	0.220294	0.150423
chr20_33872461_33872659	0.204373	6.29426	4.69172	1.35462e-06	1.54436e-10
chr20_33999674_33999872	0.232143	7.501	5.59122	1.12742e-08	3.16663e-14
chr20_34129723_34129921	0.27962	9.56407	7.12902	5.05439e-13	5.66094e-22
chr20_34204839_34205037	0.281249	9.63484	7.18177	3.44072e-13	2.84908e-22
chr20_34330008_34330206	0.03488	-1.07087	-0.798223	0.787629	0.857886
chr20_34330108_34330306	0.329231	11.7198	8.73593	1.20834e-18	5.04283e-32
chr20_34542121_34542319	0.208754	6.48466	4.83364	6.70285e-07	4.4465e-11
chr20_34542544_34542742	0.202703	6.22173	4.63765	1.76197e-06	2.45859e-10
chr20_34638854_34639052	0.704368	28.021	20.8868	3.5315e-97	4.50248e-173
chr20_34638954_34639152	0.158398	4.29646	3.20256	0.000681048	8.67735e-06
chr20_34824293_34824491	0.693039	27.5288	20.5198	7.15794e-94	3.97184e-167
chr20_35579978_35580176	0.0877192	1.2252	0.913261	0.180553	0.110249
chr20_36322371_36322569	0.343512	12.3404	9.1985	1.8149e-20	2.74346e-35
chr20_36661741_36661939	0.372671	13.6075	10.143	1.78055e-24	1.80727e-42
chr20_36661849_36662047	0.276822	9.44248	7.03839	9.72401e-13	1.82034e-21
chr20_36662050_36662248	0.343021	12.3191	9.18259	2.10419e-20	3.57539e-35
chr20_37063889_37064087	0.39286	14.4848	10.7969	1.77979e-27	7.55766e-48
chr20_388900_389098	0.149009	3.88851	2.89848	0.0018749	5.04315e-05
chr20_39969369_39969567	0.562863	21.8721	16.3034	4.66814e-60	2.394e-106
chr20_40246930_40247128	0.0254197	-1.48196	-1.10464	0.865343	0.930824
chr20_42187563_42187761	0.321427	11.3807	8.48315	1.09593e-17	2.6083e-30
chr20_42839328_42839526	0.468631	17.7773	13.2512	2.22133e-40	5.29388e-71
chr20_42939740_42939938	0.291784	10.0926	7.52301	2.67646e-14	2.97746e-24
chr20_42984249_42984447	0.0374918	-0.957376	-0.713624	0.76227	0.830811
chr20_43883106_43883304	0.143016	3.62809	2.70436	0.00342178	0.000142764
chr20_43991717_43991915	0.487946	18.6167	13.8768	4.37849e-44	1.17688e-77
chr20_44485918_44486116	0.341971	12.2734	9.14857	2.8845e-20	6.28964e-35
chr20_44509769_44509967	0.0510203	-0.369508	-0.27543	0.608507	0.644126
chr20_44746824_44747022	0.108115	2.11149	1.5739	0.0577553	0.0173649
chr20_45947686_45947884	0.0398726	-0.85392	-0.636508	0.737777	0.803425
chr20_47835850_47836048	0.988615	40.3727	30.0937	2.93056e-199	0
chr20_47895073_47895271	0.112553	2.30434	1.71765	0.0429305	0.0106018
chr20_49574949_49575147	0.297143	10.3255	7.69658	6.98794e-15	2.70219e-25
chr20_49575268_49575466	1.17618	48.523	36.1689	9.395e-287	0
chr20_5093696_5093894	1.23014	50.8679	37.9167	0	0
chr20_5100512_5100710	0.318171	11.2393	8.37771	2.69844e-17	1.3077e-29
chr20_54967620_54967818	0.046875	-0.549641	-0.4097	0.658987	0.708717
chr20_55043621_55043819	0.259269	8.67971	6.46982	4.90593e-11	1.9839e-18
chr20_57414701_57414899	0.27211	9.23773	6.88577	2.87381e-12	1.25889e-20
chr20_57415665_57415863	0.0205479	-1.69366	-1.26244	0.896605	0.954835
chr20_57427660_57427858	0.0467835	-0.553615	-0.412663	0.660073	0.710079
chr20_57429141_57429339	0.357138	12.9325	9.63985	2.71346e-22	1.47504e-38
chr20_57429241_57429439	0.0348233	-1.07333	-0.80006	0.788162	0.85844
chr20_57478688_57478886	0.0296652	-1.29748	-0.967133	0.833261	0.902766
chr20_5931062_5931260	0.458333	17.3299	12.9176	1.79058e-38	1.4002e-67
chr20_62289584_62289782	1.11613	45.9136	34.2238	5.35263e-257	0
chr20_62612420_62612618	0.579813	22.6086	16.8524	5.03853e-64	1.7822e-113
chr20_62795762_62795960	0.270675	9.17536	6.83927	3.97979e-12	2.25044e-20
chr21_15755370_15755568	0.165007	4.58365	3.41664	0.000317	2.28463e-06
chr21_26023287_26023485	0.129697	3.04932	2.27295	0.0115147	0.00114682
chr21_26979708_26979906	0.201736	6.17968	4.60631	2.04939e-06	3.21157e-10
chr21_27107119_27107317	0.0643379	0.209191	0.15593	0.438044	0.417149
chr21_27107231_27107429	0.416363	15.5061	11.5582	3.35591e-31	1.57763e-54
chr21_28217584_28217782	0.157221	4.24533	3.16446	0.000776866	1.09134e-05
chr21_30365081_30365279	0.317561	11.2127	8.35792	3.19159e-17	1.76569e-29
chr21_30396902_30397100	0.534712	20.6488	15.3916	9.32543e-54	5.00151e-95
chr21_30445885_30446083	0.491249	18.7602	13.9838	9.79351e-45	7.99448e-79
chr21_33031914_33032112	0.146118	3.76289	2.80484	0.00251707	8.39819e-05
chr21_33765368_33765566	0.162178	4.46074	3.32502	0.000442065	4.08387e-06
chr21_33984762_33984960	0.287883	9.92313	7.39666	6.98258e-14	1.6512e-23
chr21_34915054_34915252	0.28143	9.6427	7.18763	3.29627e-13	2.63907e-22
chr21_34915267_34915465	0.503047	19.2729	14.3659	4.2345e-47	4.5397e-83
chr21_35014725_35014923	0.40779	15.1336	11.2805	8.19067e-30	4.86404e-52
chr21_35747711_35747909	0.217949	6.88419	5.13145	1.43758e-07	2.90578e-12
chr21_35898997_35899195	0.151055	3.97739	2.96473	0.00151475	3.48382e-05
chr21_37528507_37528705	0.056338	-0.138436	-0.10319	0.541094	0.555052
chr21_39125756_39125954	0.0397876	-0.857615	-0.639263	0.738674	0.804448
chr21_40752222_40752420	0.122887	2.75336	2.05235	0.020068	0.00294931
chr21_40752322_40752520	0.152865	4.05607	3.02338	0.00124985	2.49528e-05
chr21_41239249_41239447	0.0776409	0.787263	0.586823	0.278661	0.215564
chr21_43735397_43735595	0.06139	0.0810975	0.0604497	0.475899	0.467682
chr21_45553443_45553641	0.297132	10.325	7.69623	7.00723e-15	2.71553e-25
chr21_46293511_46293709	0.108708	2.13724	1.59309	0.0555701	0.0162893
chr21_46441475_46441673	0.211055	6.58465	4.90817	4.59648e-07	2.27981e-11
chr21_47738010_47738208	0.201258	6.15891	4.59083	2.20745e-06	3.66234e-10
chr22_17680407_17680605	0.459001	17.3589	12.9392	1.35138e-38	8.44885e-68
chr22_18111400_18111598	0.0203044	-1.70424	-1.27033	0.898017	0.955832
chr22_18718001_18718199	0.0377376	-0.946696	-0.705664	0.759801	0.828103
chr22_18718101_18718299	0.107965	2.10499	1.56905	0.0583184	0.0176463
chr22_18718201_18718399	0.185793	5.48688	4.0899	2.15778e-05	2.04543e-08
chr22_19132065_19132263	0.0365297	-0.999185	-0.744789	0.7718	0.841148
chr22_21356308_21356506	0.0701754	0.462856	0.345011	0.365043	0.321734
chr22_22020227_22020425	1.01542	41.5377	30.962	8.75703e-211	0
chr22_23487605_23487803	0.0740739	0.632262	0.471286	0.318718	0.263608
chr22_24384166_24384364	0.230028	7.40907	5.52269	1.66923e-08	6.35942e-14
chr22_24951847_24952045	0.659999	26.0931	19.4497	1.46663e-84	2.18518e-150
chr22_25723109_25723307	0.188606	5.60915	4.18104	1.45091e-05	1.01662e-08
chr22_25843962_25844160	0.987648	40.3307	30.0623	7.5298e-199	0
chr22_26908325_26908523	0.269884	9.14099	6.81366	4.75748e-12	3.09427e-20
chr22_26961186_26961384	0.0529447	-0.285885	-0.213098	0.584375	0.612517
chr22_29949611_29949809	0.396641	14.6491	10.9194	4.65669e-28	6.82642e-49
chr22_30162866_30163064	0.126236	2.89892	2.16084	0.0153538	0.00187227
chr22_30163284_30163482	0.195663	5.91579	4.40961	5.17796e-06	1.65145e-09
chr22_30642631_30642829	0.0935778	1.47978	1.10302	0.135008	0.0694658
chr22_30987777_30987975	0.0414071	-0.787242	-0.586807	0.721333	0.78443
chr22_31063719_31063917	0.207421	6.42672	4.79045	8.32026e-07	6.51927e-11
chr22_31518860_31519058	0.120121	2.63317	1.96276	0.0248372	0.00422954
chr22_31556100_31556298	0.203248	6.2454	4.6553	1.61755e-06	2.11353e-10
chr22_31688348_31688546	0.434841	16.309	12.1567	2.64251e-34	4.25539e-60
chr22_32058113_32058311	0.383543	14.0799	10.4951	4.54751e-26	2.52262e-45
chr22_32555144_32555342	0.0692289	0.421728	0.314354	0.376626	0.336612
chr22_36044397_36044595	0.298451	10.3823	7.73894	5.0124e-15	1.49215e-25
chr22_36635502_36635700	0.412582	15.3418	11.4357	1.38611e-30	2.0093e-53
chr22_36784061_36784259	0.228233	7.33109	5.46456	2.32022e-08	1.14146e-13
chr22_36925105_36925303	0.87619	35.4874	26.4522	1.72198e-154	3.84293e-276
chr22_37172052_37172250	0.0307727	-1.24935	-0.93126	0.824141	0.894231
chr22_37608354_37608552	0.0808095	0.924952	0.689456	0.245268	0.177495
chr22_38245337_38245535	2.02019	85.1988	63.5069	0	0
chr22_38349608_38349806	0.0652174	0.24741	0.184419	0.426842	0.402295
chr22_38732420_38732618	0.0576993	-0.0792785	-0.0590939	0.523561	0.531594
chr22_38902214_38902412	0.387415	14.2482	10.6205	1.19589e-26	2.30055e-46
chr22_39898246_39898444	0.984131	40.1779	29.9484	2.30601e-197	0
chr22_40573857_40574055	0.288797	9.96283	7.42625	5.58579e-14	1.1083e-23
chr22_40742450_40742648	0.647104	25.5327	19.032	4.6351e-81	4.27424e-144
chr22_41252544_41252742	0.113654	2.35217	1.7533	0.0397753	0.00933208
chr22_41864595_41864793	0.317113	11.1933	8.34342	3.60855e-17	2.19944e-29
chr22_41865043_41865241	0.764706	30.643	22.8412	8.94443e-116	1.63829e-206
chr22_42017190_42017388	0.316713	11.1759	8.33047	4.02619e-17	2.67544e-29
chr22_42078324_42078522	0.186481	5.51681	4.11221	1.95947e-05	1.72605e-08
chr22_42228579_42228777	0.0689689	0.410431	0.305933	0.379828	0.340745
chr22_42466720_42466918	0.143425	3.64583	2.71759	0.00328796	0.000133263
chr22_42486658_42486856	0.294118	10.1941	7.59862	1.49658e-14	1.05382e-24
chr22_43011176_43011374	0.275812	9.3986	7.00568	1.22898e-12	2.76481e-21
chr22_43278254_43278452	0.0316553	-1.211	-0.902672	0.81665	0.887052
chr22_44535779_44535977	0.11438	2.38374	1.77683	0.037798	0.00856883
chr22_47045692_47045890	0.0490193	-0.45646	-0.340244	0.633164	0.675971
chr22_47158296_47158494	0.0326797	-1.16648	-0.869492	0.807711	0.87829
chr22_50311929_50312127	0.0487805	-0.466839	-0.34798	0.636072	0.679692
chr22_50356165_50356363	0.0245391	-1.52022	-1.13317	0.871428	0.935772
chr22_50628931_50629129	0.132075	3.15262	2.34995	0.00938795	0.000809062
chr22_50946578_50946776	0.601392	23.5463	17.5513	2.90488e-69	6.84583e-123
chr2_101618660_101618858	0.407691	15.1293	11.2773	8.49468e-30	5.19263e-52
chr2_102721003_102721201	0.135087	3.28353	2.44753	0.00719192	0.000512576
chr2_105953921_105954119	1.08229	44.4431	33.1277	5.93485e-241	0
chr2_10829969_10830167	0.65714	25.9688	19.357	8.89082e-84	5.57709e-149
chr2_113299935_113300133	0.957518	39.0214	29.0864	2.66666e-186	0
chr2_113341948_113342146	0.682484	27.0701	20.178	7.64604e-91	1.10708e-161
chr2_113342092_113342290	0.182926	5.36231	3.99705	3.2069e-05	4.10821e-08
chr2_114647567_114647765	0.495451	18.9428	14.1199	1.43262e-45	2.53285e-80
chr2_114648462_114648660	0.0582085	-0.0571524	-0.0426012	0.51699	0.522788
chr2_11696352_11696550	0.137065	3.36947	2.51159	0.00600942	0.000376563
chr2_118572189_118572387	0.261913	8.79463	6.55548	2.77311e-11	7.17601e-19
chr2_118845958_118846156	0.161615	4.43628	3.30679	0.000471861	4.57626e-06
chr2_12050028_12050226	0.165544	4.607	3.43404	0.00029733	2.04262e-06
chr2_120770561_120770759	0.344118	12.3667	9.21812	1.5118e-20	1.97781e-35
chr2_122288379_122288577	0.0449431	-0.633586	-0.472273	0.681634	0.736825
chr2_128051605_128051803	0.276849	9.44367	7.03927	9.66241e-13	1.79982e-21
chr2_130939068_130939266	0.15306	4.06451	3.02967	0.00122411	2.40669e-05
chr2_131100376_131100574	0.346937	12.4892	9.30943	6.42589e-21	4.2732e-36
chr2_131185238_131185436	0.0249993	-1.50023	-1.11826	0.868272	0.933222
chr2_134273228_134273426	0.0379433	-0.937759	-0.699002	0.757725	0.825816
chr2_135809768_135809966	0.350493	12.6438	9.42464	2.15802e-21	6.05332e-37
chr2_136499505_136499703	0.0277531	-1.38056	-1.02907	0.848276	0.916293
chr2_136743131_136743329	0.616434	24.2	18.0386	4.852e-73	1.11328e-129
chr2_142813217_142813415	0.283334	9.72543	7.2493	2.09465e-13	1.17451e-22
chr2_148778202_148778400	0.0526316	-0.299493	-0.223241	0.588326	0.617718
chr2_148778524_148778722	0.0228573	-1.5933	-1.18764	0.882513	0.944454
chr2_151344091_151344289	0.0384624	-0.915199	-0.682186	0.752439	0.819956
chr2_152266343_152266541	0.32369	11.4791	8.55645	5.81989e-18	8.40461e-31
chr2_15701337_15701535	0.169585	4.78261	3.56494	0.000181971	8.65173e-07
chr2_159651758_159651956	0.161376	4.42588	3.29904	0.000485085	4.80239e-06
chr2_160372958_160373156	0.0519136	-0.330692	-0.246497	0.597351	0.629562
chr2_160471967_160472165	0.26	8.7115	6.49352	4.19272e-11	1.49938e-18
chr2_160472911_160473109	0.126237	2.89894	2.16086	0.0153531	0.00187212
chr2_162016845_162017043	0.249205	8.24241	6.14386	4.02707e-10	8.43909e-17
chr2_162164885_162165083	0.183466	5.3858	4.01455	2.97791e-05	3.60616e-08
chr2_162480830_162481028	0.183379	5.38202	4.01174	3.01368e-05	3.68271e-08
chr2_162480961_162481159	0.152542	4.04203	3.01291	0.00129377	2.64954e-05
chr2_163002032_163002230	0.106628	2.04687	1.52573	0.0635391	0.0203356
chr2_163003847_163004045	0.0929406	1.4521	1.08239	0.13954	0.0732374
chr2_16825336_16825534	0.148937	3.88537	2.89614	0.00188893	5.10873e-05
chr2_169757686_169757884	0.16873	4.74544	3.53724	0.000202169	1.04024e-06
chr2_169769726_169769924	0.310076	10.8875	8.11551	2.41874e-16	6.61e-28
chr2_170335899_170336097	0.17647	5.08176	3.78792	7.59558e-05	1.86977e-07
chr2_170430233_170430431	0.178918	5.18818	3.86725	5.50356e-05	1.06182e-07
chr2_170440786_170440984	0.813422	32.7599	24.4191	5.36356e-132	1.09857e-235
chr2_170550807_170551005	0.0246907	-1.51363	-1.12826	0.870394	0.934941
chr2_170655299_170655497	0.382052	14.0151	10.4468	7.57529e-26	6.29761e-45
chr2_172778861_172779059	0.65335	25.8041	19.2343	9.55766e-83	3.98615e-147
chr2_175260304_175260502	0.345603	12.4313	9.26623	9.64186e-21	8.83828e-36
chr2_176032797_176032995	0.337364	12.0733	8.99937	1.13505e-19	7.30972e-34
chr2_178077389_178077587	1.19635	49.3995	36.8222	4.08104e-297	0
chr2_178128114_178128312	0.0459184	-0.591209	-0.440685	0.670279	0.72281
chr2_178483352_178483550	0.328725	11.6979	8.71954	1.39665e-18	6.53512e-32
chr2_179278598_179278796	0.0558975	-0.157575	-0.117456	0.546751	0.562604
[truncated: 1,379 more rows]

## Sheet: Sheet2
MPRA enhancer activities for tested CAGE elements
cage_element	Tested CAGE element coordinates (hg19)
statistic	Enhancer activity from GLM
zscore	Enhancer activity zscore
mad.score	Enhancer activity median absolute deviation (MAD) score
pval.mad	MAD score p value
pval.zscore	Z score p value
